# Supplementary material for: Monothia [22]pentaphyrin(2.0.1.1.0): a core-modified isomer of sapphyrin
Source: Royal Society of Chemistry journal article supplement (doi:10.1039/d2dt00698g), 2022-01-01
Supplement: d2dt00698g2.pdf [file d2dt00698g2.pdf]

## Electronic Supplementary Information

### **Monothia [22]pentaphyrin(2.0.1.1.0): A core modified isomer of Sapphyrin**

Sipra Sucharita Sahoo, Sameeta Sahoo and Pradeepta K. Panda\*

School of Chemistry, University of Hyderabad, Hyderabad, India, 500046

Email: [pkpsc@uohyd.ernet.in](mailto:pkpsc@uohyd.ernet.in) ; [pradeepta.panda@uohyd.ac.in](mailto:pradeepta.panda@uohyd.ac.in)

## Table of Contents

|    |                                                                                                        |       |
|----|--------------------------------------------------------------------------------------------------------|-------|
| 1  | Instrumentation and reagents                                                                           | 2     |
| 2  | Experimental procedures                                                                                | 3     |
| 3  | <sup>1</sup> H NMR and <sup>13</sup> C NMR spectra                                                     | 4-7   |
| 4  | HRMS data                                                                                              | 8-10  |
| 5  | Comparative NMR spectra                                                                                | 11    |
| 6  | UV-vis absorption spectral analysis                                                                    | 12-14 |
| 7  | Emission spectrum                                                                                      | 14    |
| 8  | Computational studies                                                                                  | 14-27 |
|    | 8.1. Optimized energies of tautomers                                                                   | 16    |
|    | 8.2. Frontier molecular orbital diagrams                                                               | 17    |
|    | 8.3. Energies of mode of protonation of <b>8</b>                                                       | 17-18 |
|    | 8.4. Energies of Pd mode of binding                                                                    | 18    |
|    | 8.5. Coordinates of optimized geometries of <b>1,2,3,4, 8</b> , its tautomers, <b>8-H</b> and <b>9</b> | 19-27 |
|    | 8.6. Absorption spectra                                                                                | 28    |
|    | 8.7. NICS and HOMA calculations                                                                        | 28    |
| 9  | Crystal structure and packing diagrams of <b>8</b> and <b>9</b>                                        | 27-28 |
| 10 | Crystallographic parameters                                                                            | 28-29 |
| 11 | References                                                                                             | 29    |

### Instrumentation and reagents:

NMR spectra were recorded on a Bruker Ascend-500 and Bruker Avance-500 MHz FT NMR spectrometer using tetramethylsilane (TMS,  $\delta = 0$ ) as an internal standard at room temperature. Mass spectral determinations were carried out by Bruker Maxis HRMS by ESI techniques. UV Visible-NIR spectra were recorded on a Perkin Elmer Lambda 35 UV-Visible spectrometer. Fluorescence spectra were recorded on a JASCO FP-8500 spectrofluorometer. Spectroscopic grade solvents were used for all absorbance measurement. Commercially available solvents were distilled before use. Reagents were used as received.

All crystallographic data were collected in Rigaku XtaLAB Synergy, single source X-ray diffractometer. Mo-K $\alpha$  ( $\lambda = 0.71073 \text{ \AA}$ ) radiation was used to collect the X-ray reflections of the crystal. Data reduction was performed using CrysAlisPro 1.171.40.35a.<sup>S1</sup> Intensities for absorption were corrected using CrysAlisPro 1.171.40.35a.<sup>S1</sup> and refined using SHELXL2014/7.<sup>S2a,S2b</sup> with anisotropic displacement parameters for non-H atoms. Crystallographic data (including the structure factor) for all structures in this paper have been deposited in the Cambridge Crystal Crystallographic Data Centre as supplementary publication number CCDC 2125056-2125057.

## Experimental Procedures

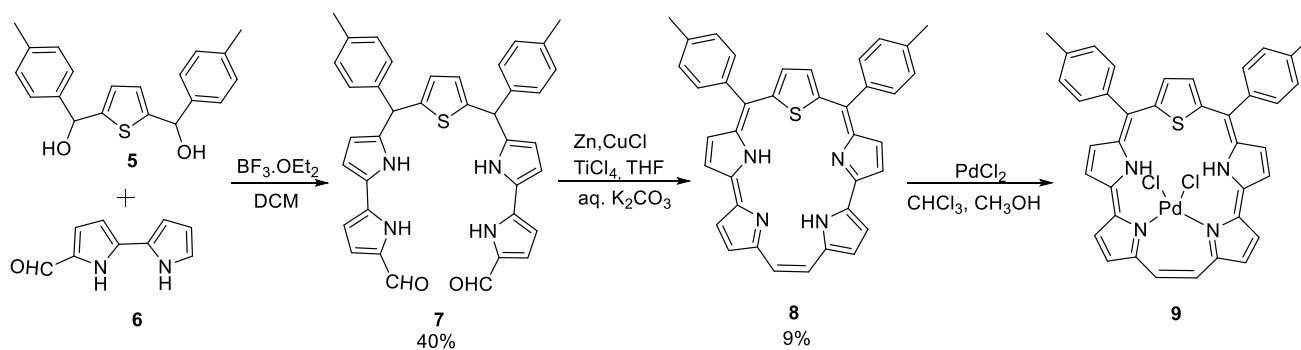

Compound **5** and **6** has been synthesized following reported literature.<sup>53</sup>

### Synthesis of 5',5'''-(thiophene-2,5-diylbis(p-tolylmethylene))bis((1H,1'H-[2,2'-bipyrrole]-5-carbaldehyde) **7**:

2,5-Bis(4-tolylhydroxymethyl)thiophene (**5**) (200 mg, 0.62 mmol) and [2,2'-bipyrrole]-5-carboxaldehyde (**6**) (247 mg, 1.54 mmol) were taken in an oven dried 500 mL two necked RB and dissolved in CH<sub>2</sub>Cl<sub>2</sub> (300 mL). The solution was bubbled with N<sub>2</sub> for 20 min and then BF<sub>3</sub>·OEt<sub>2</sub> (60 μL) was added to it. The mixture was stirred at room temperature in dark under N<sub>2</sub> atmosphere for 6 h. Then the reaction mixture was washed with water and organic layer was dried over anhydrous Na<sub>2</sub>SO<sub>4</sub> and then concentrated under reduced pressure. The resulting solid was purified by column chromatography with 20% ethyl acetate:hexane mixture to obtain **7** as bright yellow coloured solid. Yield: 40%; Decomposed >180 °C before melting. <sup>1</sup>H NMR (500 MHz, DMSO-D<sub>6</sub>) δ in ppm: 11.89 (s, 2H), 11.06 (s, 2H), 9.31 (s, 2H), 7.18 (d, J = 8.28 Hz, 4H), 7.14 (d, J = 8.13 Hz, 4H), 6.99 (dd, J = 2.27 Hz, 2H), 6.62 (s, 2H), 6.60 (t, J = 2.84 Hz, 2H), 6.51 (dd, J = 2.24 Hz, 2H), 5.82 (t, J = 2.66 Hz, 2H), 5.58 (s, 2H), 2.51 (s, 6H); <sup>13</sup>C NMR (125 MHz, DMSO-D<sub>6</sub>) δ in ppm: 177.7, 146.4, 140.4, 136.4, 136.2, 134.7, 132.3, 129.5, 128.5, 125.4, 123.7, 109.0, 108.2, 106.9, 45.3, 21.1; HRMS(ESI<sup>+</sup>): m/z calculated for C<sub>38</sub>H<sub>32</sub>N<sub>4</sub>SO<sub>2</sub> (M+H<sup>+</sup>): 609.2323; found: 609.2325; IR (ν in cm<sup>-1</sup>): 3259, 3212, 1599, 1544, 1509.

### Synthesis of sapphyrene **8**:

A low-valent titanium reagent was prepared in situ by adding TiCl<sub>4</sub> (0.36 mL, 3.28 mmol) to a solution of activated Zn (426 mg, 6.56 mmol), CuCl (64.98 mg, 0.656 mmol) and THF in a three-necked RB at 0 °C and then heating to reflux for 3 h. To this slurry, THF solution of compound **7** (100 mg, 0.164 mmol) was added dropwise for 1 h under reflux condition. After completion of addition, the reaction mixture was kept for refluxing for additional 2 h and then slowly brought to room temperature. Then it was cooled to 0 °C and hydrolysed with aqueous K<sub>2</sub>CO<sub>3</sub> solution. It was kept for open air oxidation overnight and then the reaction mixture was filtered using celite. The filtrate was washed with water and the organic layer was dried over anhydrous Na<sub>2</sub>SO<sub>4</sub> and concentrated under reduced pressure. The crude reaction mixture was purified by silicagel column chromatography with 80:20 of hexane-ethyl acetate mixture as eluent to obtain **8** as blue colour solid. Yield: 9%. M.P.: >300 °C. <sup>1</sup>H NMR (500 MHz, CDCl<sub>3</sub>) δ in ppm: 10.38 (s, 2H), 10.36 (d, J = 4.17 Hz, 2H), 10.19 (d, J = 4.61 Hz, 2H), 9.99 (s, 2H), 9.68 (d, J = 4.17 Hz, 2H), 9.43 (d, J = 4.59 Hz, 2H), 8.37 (d, J = 7.74 Hz, 4H), 7.76 (d, J = 7.53 Hz, 4H), 2.81 (s, 6H); <sup>13</sup>C NMR (125 MHz, CDCl<sub>3</sub>) δ in ppm: 144.6, 143.4, 141.0, 138.8, 138.1, 134.3, 134.3, 132.5, 132.4, 129.3, 128.4, 128.4, 127.8, 126.7, 126.2, 112.9, 21.6; UV-vis-NIR data in CHCl<sub>3</sub> (λ<sub>max</sub> nm, log ε): 447 (5.50), 467 (5.24), 542 (3.98), 579 (4.27), 622 (4.79), 699 (3.86), 773 (4.61); HRMS (ESI<sup>+</sup>): m/z calculated for C<sub>38</sub>H<sub>28</sub>N<sub>4</sub>S (M+H<sup>+</sup>): 573.2113; found: 573.2100; IR (ν in cm<sup>-1</sup>): 2920, 2581, 1597, 1510.

### Synthesis of palladium(II)-sapphyrene **9**:

Thiasapphyrene **8** (2 mg) was taken in a two-necked RB in N<sub>2</sub> atmosphere and dissolved in 5 mL chloroform and methanol (1 mL) was added to it and then PdCl<sub>2</sub> (25 mg) was added to the above solution and kept for stirring at rt. Reaction was monitored using TLC and absorption spectroscopy. After 10-15 min all the starting material was consumed and it was concentrated under reduced pressure. Then the crude product was purified by silicagel column chromatography to yield **9** as brown colour solid. Yield: quantitative. <sup>1</sup>H NMR (500 MHz, CD<sub>2</sub>Cl<sub>2</sub>) δ in ppm: 10.58 (s, 2H), 10.21 (s, 2H), 10.06 (d, J = 4.46 Hz, 2H), 9.81 (d, 2H, J = 4.47 Hz), 9.66 (d, J = 4.44 Hz, 2H), 9.27 (d, J = 4.57 Hz, 2H), 8.71 (bs, 4H), 7.94 (d, J = 7.66 Hz, 4H), 2.84 (s, 6H); <sup>13</sup>C NMR (125 MHz, CD<sub>2</sub>Cl<sub>2</sub>) δ in ppm: 149.7, 142.2, 140.2, 138.3, 138.0, 137.1, 136.3, 134.8, 132.4, 129.7, 129.6, 129.4, 126.7, 124.2, 115.5, 21.4; UV-vis-NIR data in CHCl<sub>3</sub> (λ<sub>max</sub> nm, log ε): 491 (5.13), 623 (4.12), 667 (3.96), 804 (4.27); HRMS (ESI<sup>+</sup>): m/z calculated for C<sub>38</sub>H<sub>28</sub>ClN<sub>4</sub>PdS (M-Cl<sup>-</sup>): 713.0757; found: 713.0754; IR (ν in cm<sup>-1</sup>): 2959, 2918, 2851, 1588.

## Results and Discussion

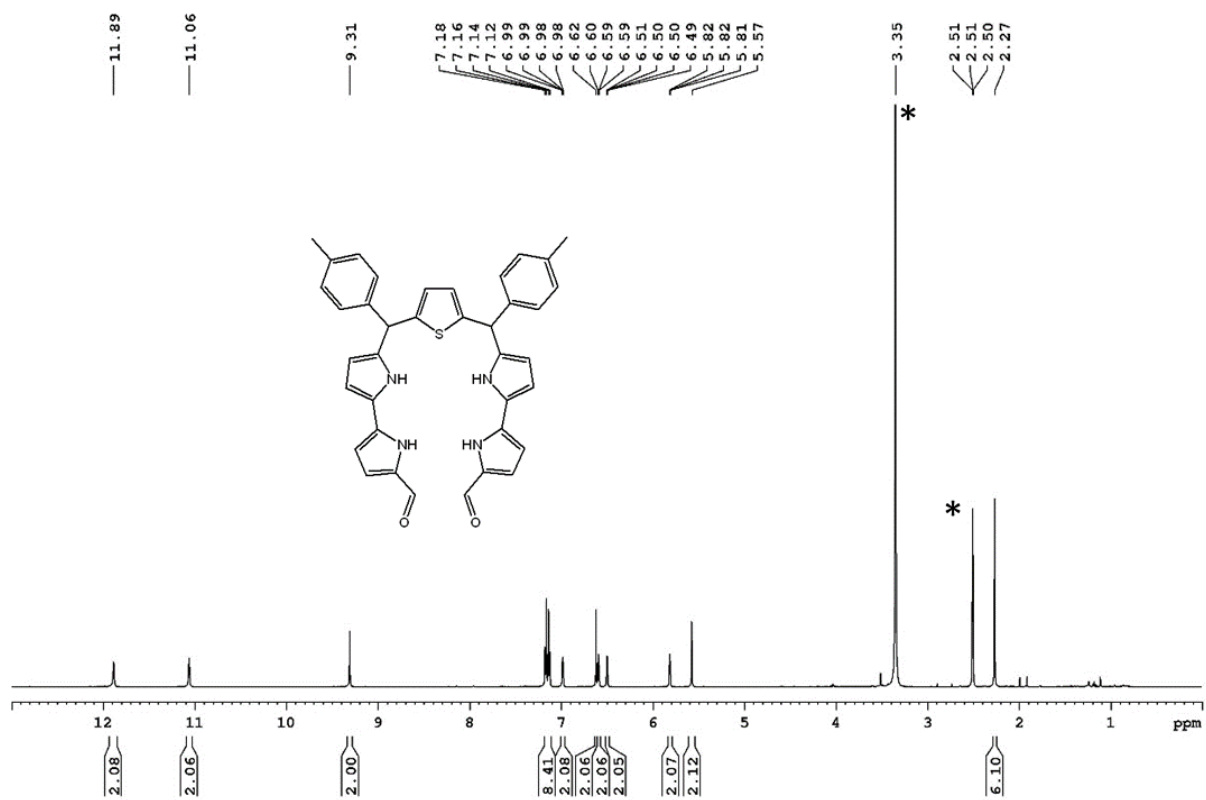

Figure S1:  $^1\text{H}$  NMR spectrum of 7 in  $\text{DMSO-}d_6$  (\*water and residual protons of solvent).

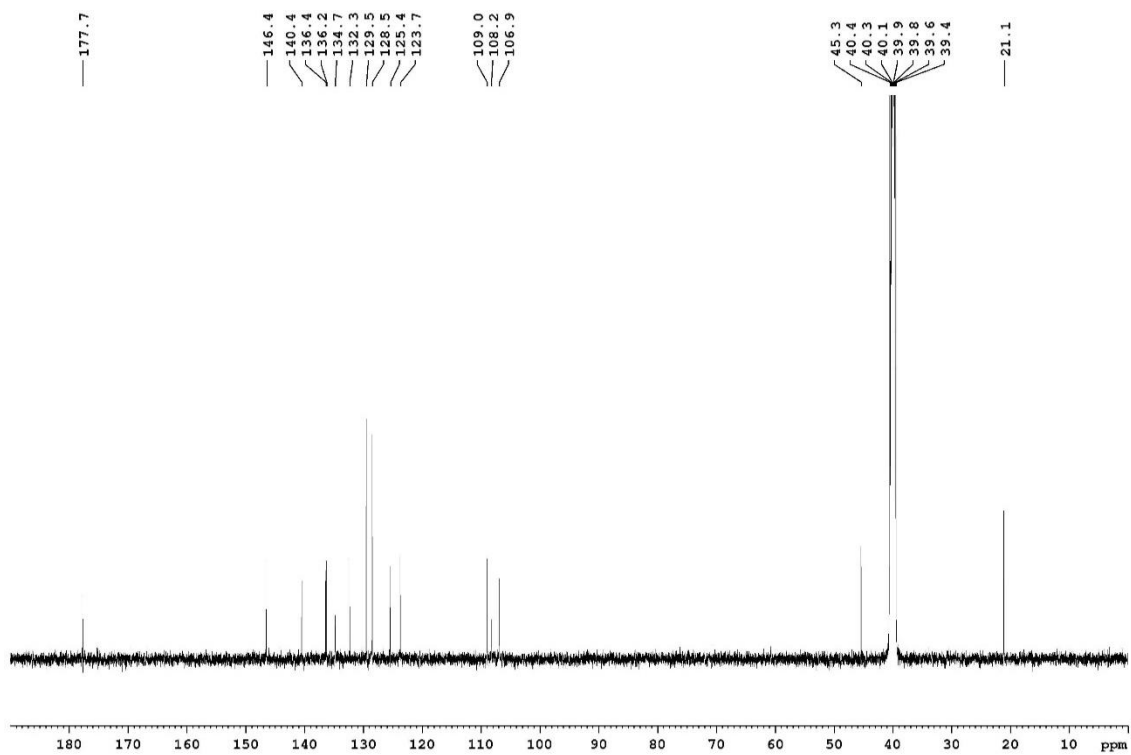

Figure S2:  $^{13}\text{C}$  NMR spectrum of 7 in  $\text{DMSO-}D_6$ .

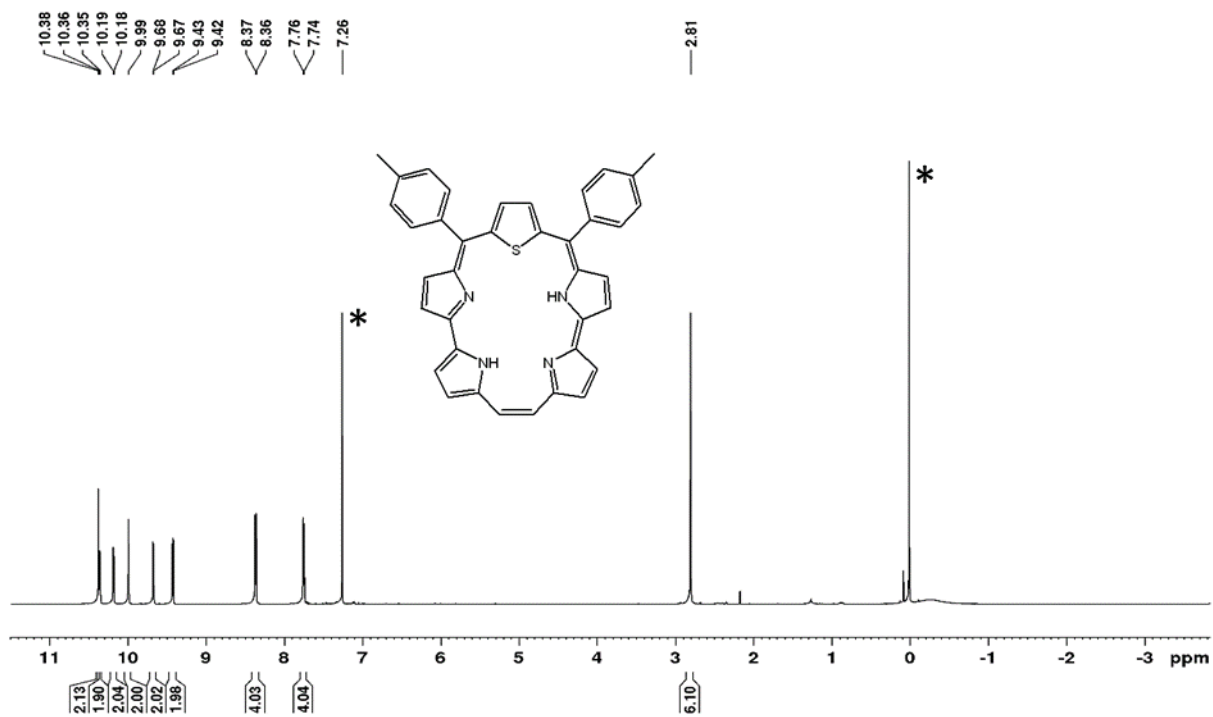

Figure S3: <sup>1</sup>H NMR spectrum of compound 8 in CDCl<sub>3</sub> (\* water and residual protons of solvent).

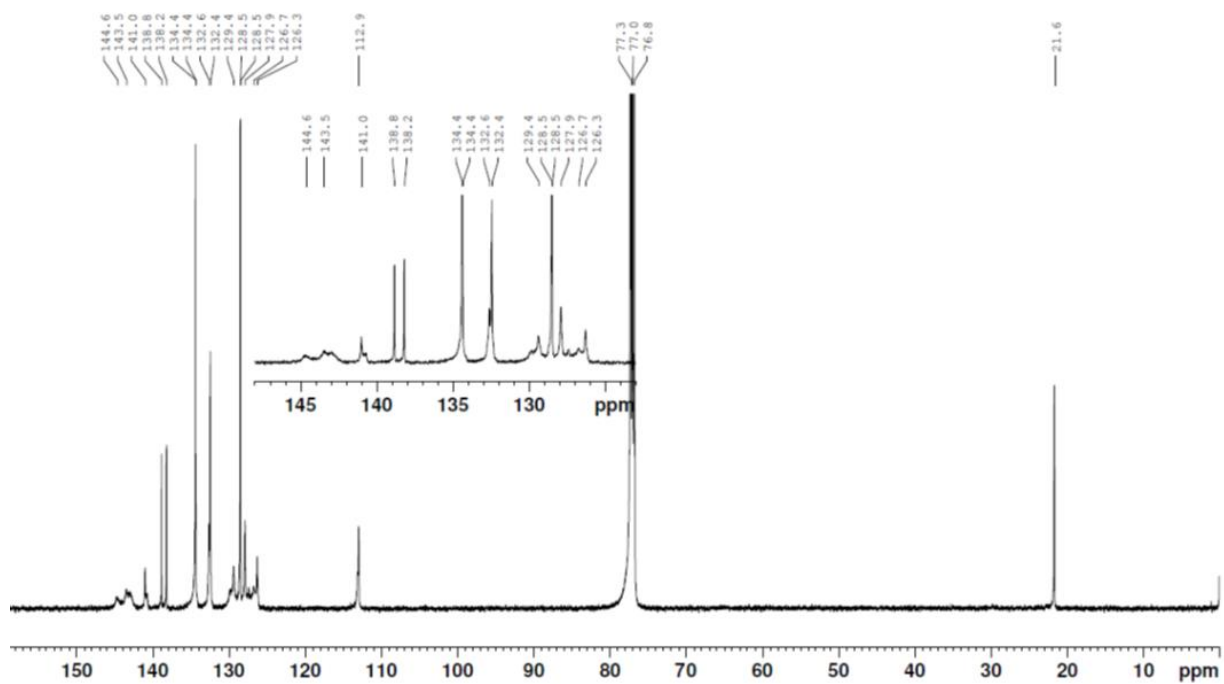

Figure S4: <sup>13</sup>C NMR spectrum of 8 in CDCl<sub>3</sub>.

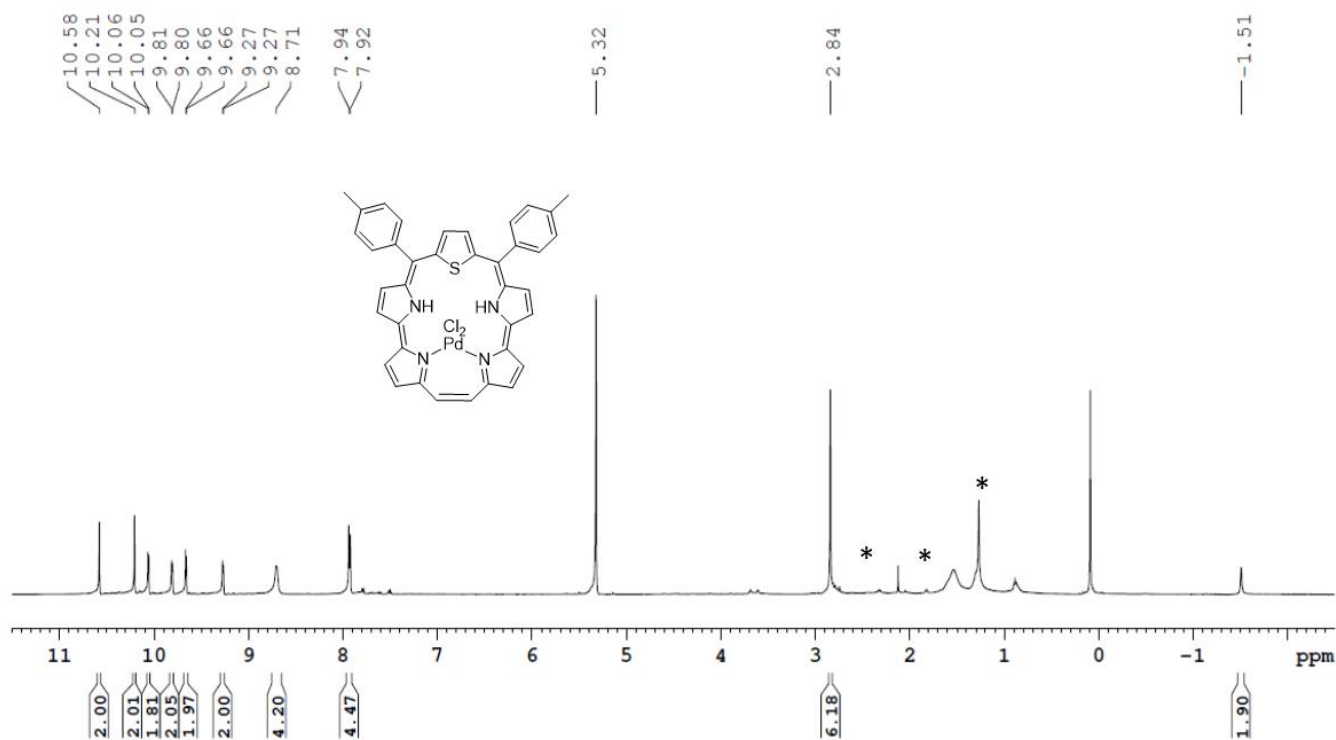

**Figure S5:** <sup>1</sup>H NMR spectrum of 9 in CD<sub>2</sub>Cl<sub>2</sub> (\* water and residual protons of solvent and impurities due to less solubility of sample).

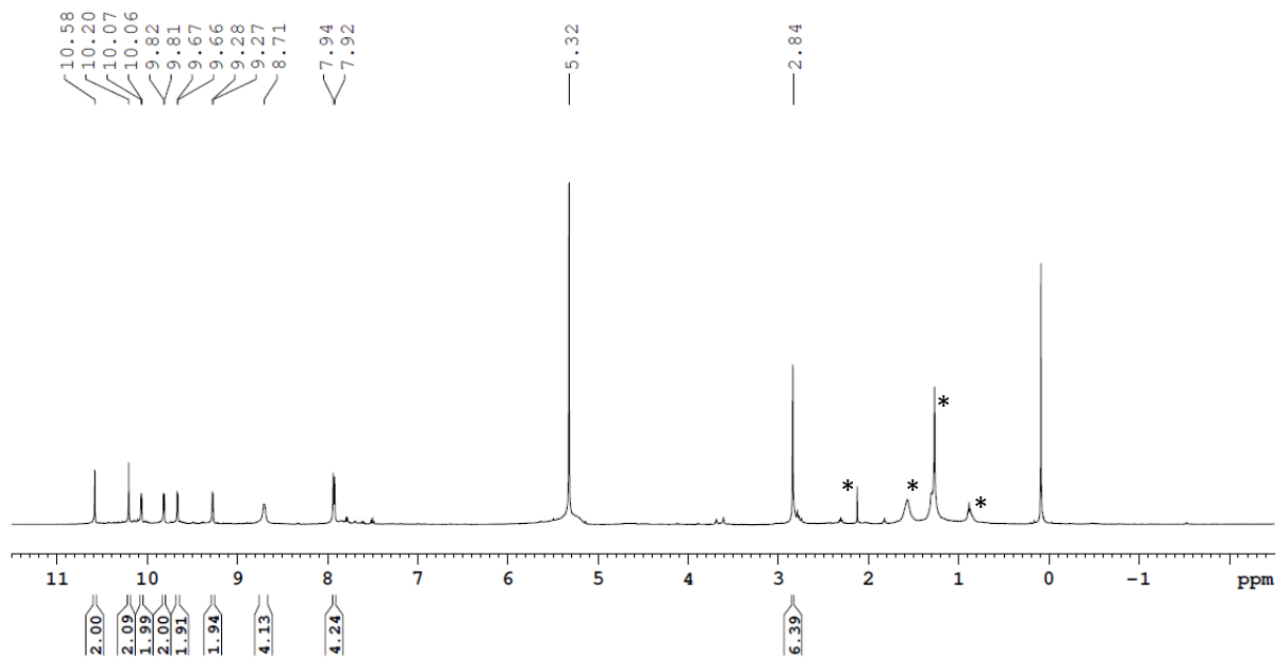

**Figure S6:** D<sub>2</sub>O exchange <sup>1</sup>H NMR spectrum of 9 in CD<sub>2</sub>Cl<sub>2</sub> (\* water and residual protons of solvent and impurities due to less solubility of sample).

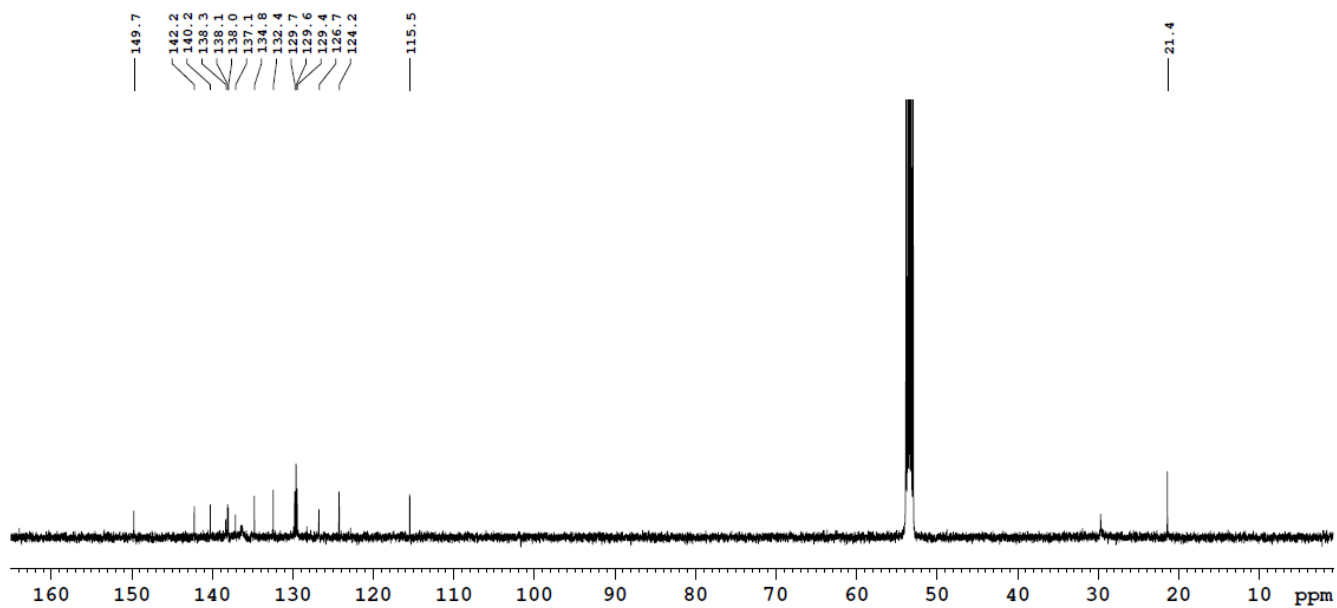

Figure S7:  $^{13}\text{C}$  NMR spectrum of **9** in  $\text{CD}_2\text{Cl}_2$ .

# Display Report

## Analysis Info

Analysis Name D:\Data\2021-data\PROF.PKPAUG\SSS-117-1.d  
Method tune\_low.m  
Sample Name SSS-117-1  
Comment

Acquisition Date 8/2/2021 4:53:16 PM

Operator BDAL  
Instrument maXis 255552.10138

## Acquisition Parameter

|             |            |                      |          |                  |           |
|-------------|------------|----------------------|----------|------------------|-----------|
| Source Type | ESI        | Ion Polarity         | Positive | Set Nebulizer    | 0.3 Bar   |
| Focus       | Not active | Set Capillary        | 4500 V   | Set Dry Heater   | 180 °C    |
| Scan Begin  | 50 m/z     | Set End Plate Offset | -500 V   | Set Dry Gas      | 4.0 l/min |
| Scan End    | 1500 m/z   | Set Charging Voltage | 0 V      | Set Divert Valve | Waste     |
|             |            | Set Corona           | 0 nA     | Set APCI Heater  | 0 °C      |

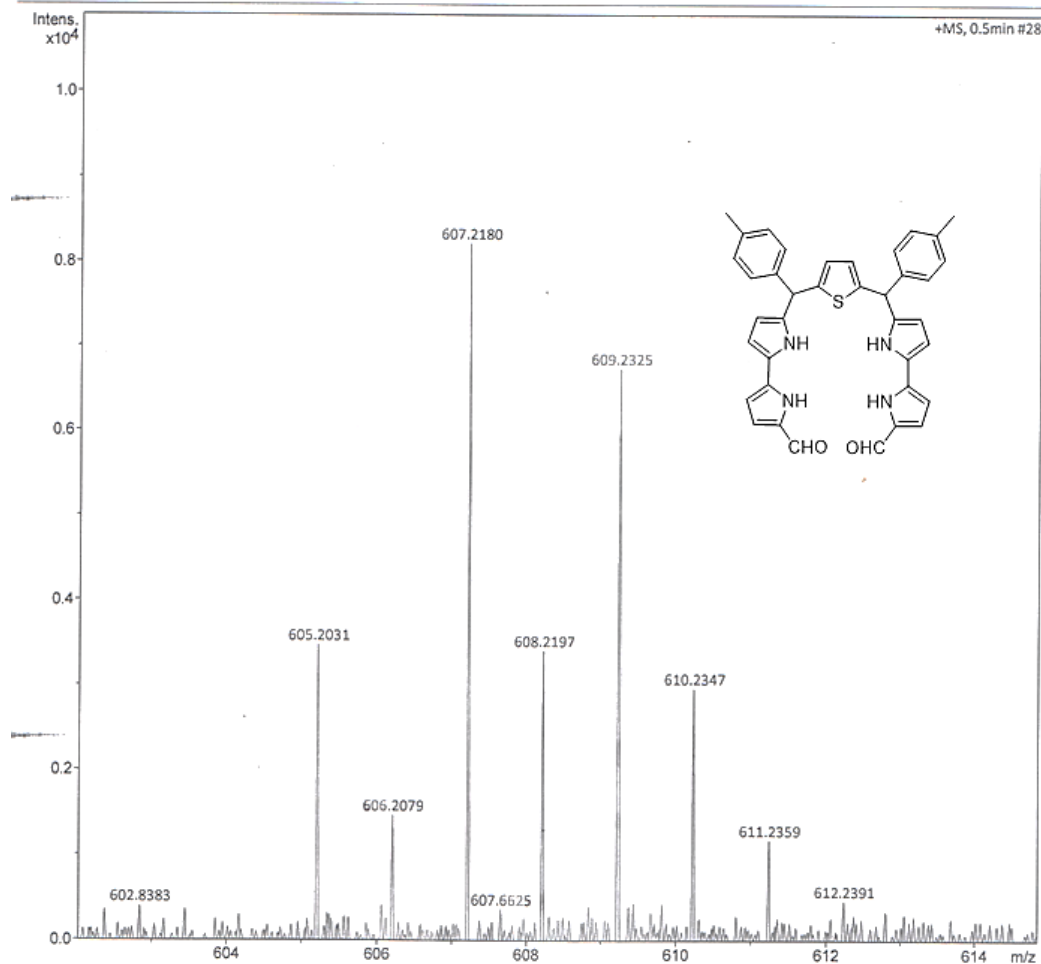

SSS-117-1.d

Bruker Compass DataAnalysis 4.2

printed: 11/22/2021 5:11:54 PM

by: BDAL

Page 1 of 1

**Figure S8:** HRMS data of **7**: m/z calculated for C<sub>38</sub>H<sub>32</sub>N<sub>4</sub>SO<sub>2</sub> (M+H<sup>+</sup>): 609.2323; found: 609.2325.



# Display Report

## Analysis Info

Analysis Name D:\Data\2019\PROF.PKP\DEC\SSS-121-1-2-R.d  
Method tune\_low\_Pos.m  
Sample Name SSS-121-1-2  
Comment

Acquisition Date 12/26/2019 4:45:15 AM

Operator UOH-Chemistry  
Instrument maXis 10138

## Acquisition Parameter

|             |            |                       |           |                  |           |
|-------------|------------|-----------------------|-----------|------------------|-----------|
| Source Type | ESI        | Ion Polarity          | Positive  | Set Nebulizer    | 0.3 Bar   |
| Focus       | Not active | Set Capillary         | 4200 V    | Set Dry Heater   | 180 °C    |
| Scan Begin  | 50 m/z     | Set End Plate Offset  | -500 V    | Set Dry Gas      | 6.0 l/min |
| Scan End    | 1500 m/z   | Set Collision Cell RF | 350.0 Vpp | Set Divert Valve | Waste     |

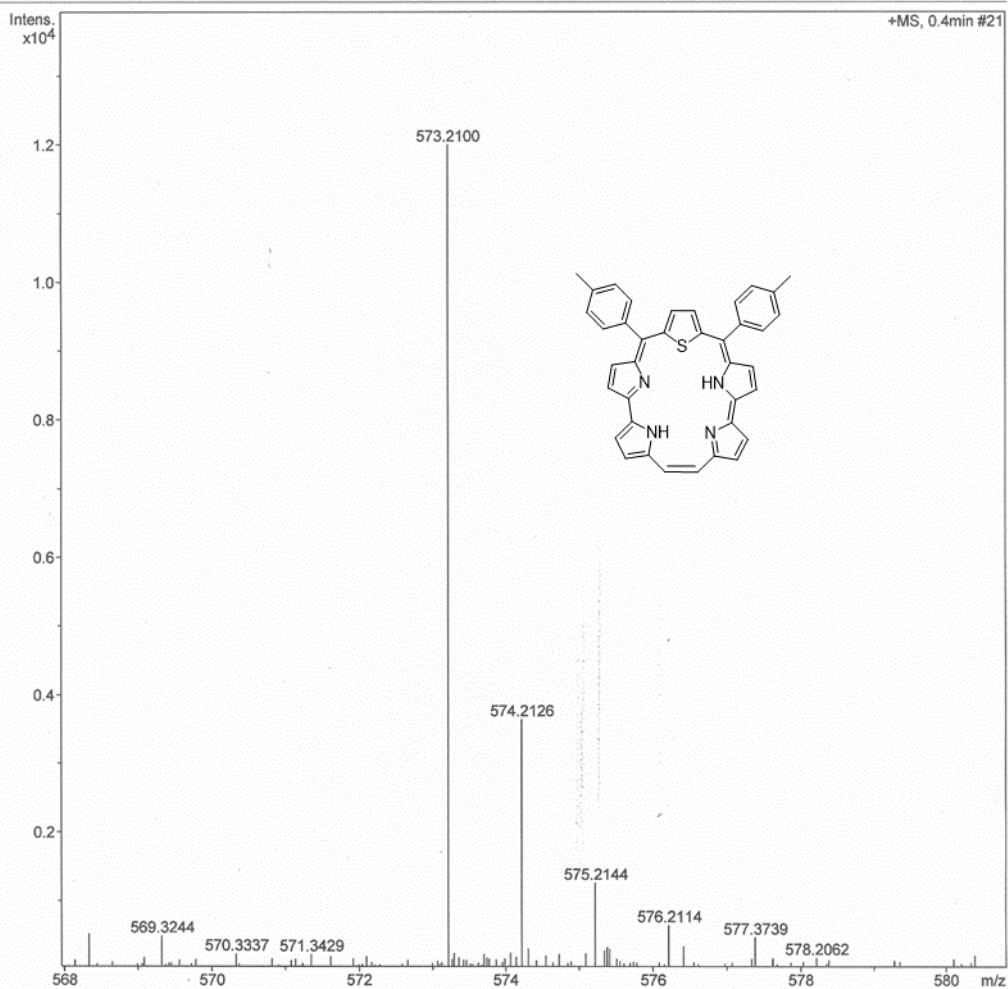

Bruker Compass DataAnalysis 4.0

printed: 12/26/2019 4:49:05 AM

Page 1 of 1

**Figure S9:** HRMS data of **8**. Calculated  $m/z$   $C_{38}H_{28}N_4S$  ( $M+H^+$ ): 573.2113; found:573.2100.

# Display Report

## Analysis Info

Analysis Name D:\Data\2021-data\PROF.PK\10CT\SSS-121-PdCL-R.d  
Method tune\_low.m  
Sample Name SSS-121-PdCL-R  
Comment

Acquisition Date 10/1/2021 2:33:16 PM

Operator BDAL  
Instrument maXis 255552.10138

## Acquisition Parameter

|             |            |                      |          |                  |           |
|-------------|------------|----------------------|----------|------------------|-----------|
| Source Type | ESI        | Ion Polarity         | Positive | Set Nebulizer    | 0.3 Bar   |
| Focus       | Not active | Set Capillary        | 4500 V   | Set Dry Heater   | 180 °C    |
| Scan Begin  | 50 m/z     | Set End Plate Offset | -500 V   | Set Dry Gas      | 4.0 l/min |
| Scan End    | 2000 m/z   | Set Charging Voltage | 0 V      | Set Divert Valve | Waste     |
|             |            | Set Corona           | 0 nA     | Set APCI Heater  | 0 °C      |

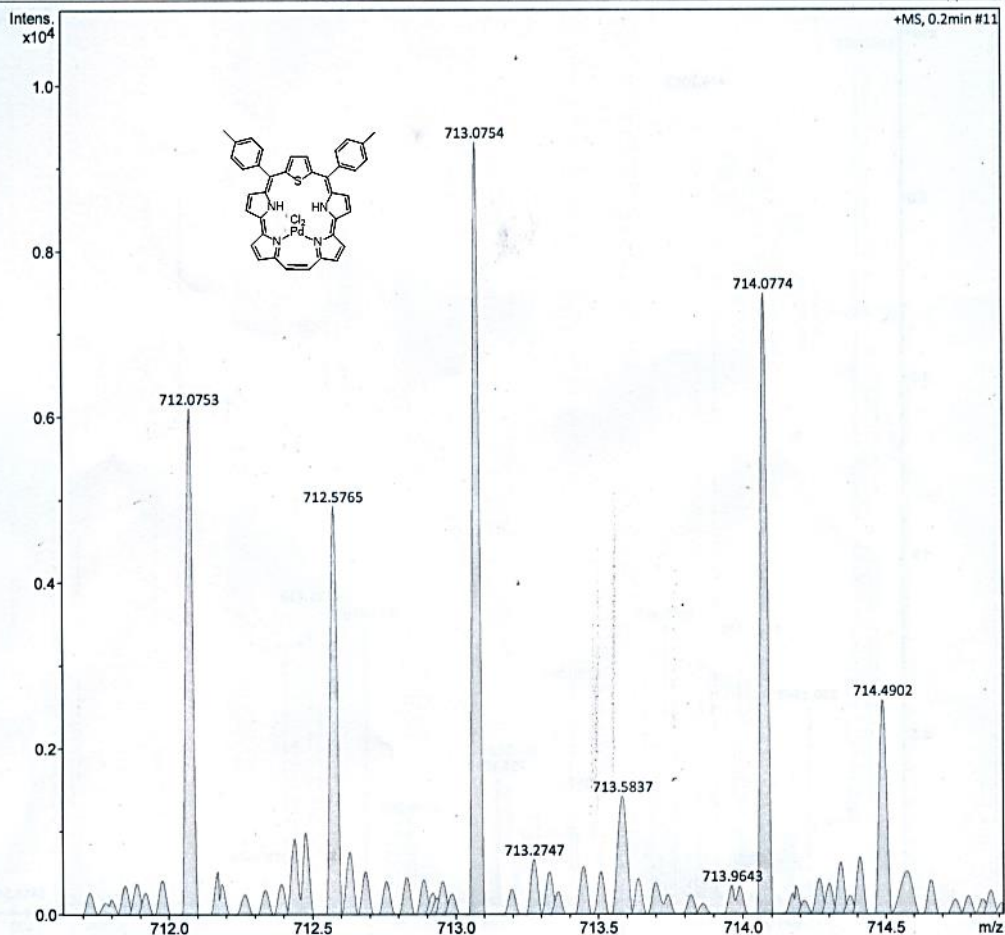

SSS-121-PdCL-R.d

Bruker Compass DataAnalysis 4.2

printed: 10/1/2021 2:36:18 PM

by: BDAL

Page 1 of 1

Figure S10: HRMS data of 9: m/z calculated for C<sub>38</sub>H<sub>28</sub>ClN<sub>4</sub>PdS (M-Cl): 713.0757; found: 713.0754.

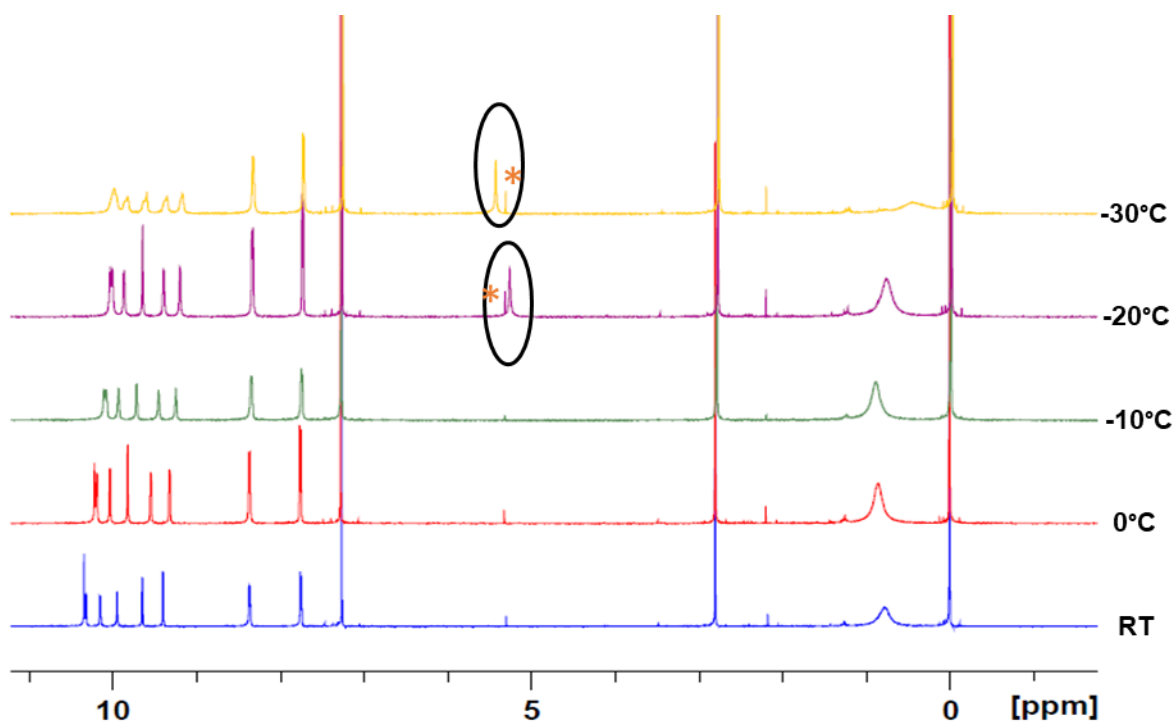

Figure S11: Variable temperature  $^1\text{H}$  NMR spectra of **8** in  $\text{CDCl}_3$  (\*DCM impurity).

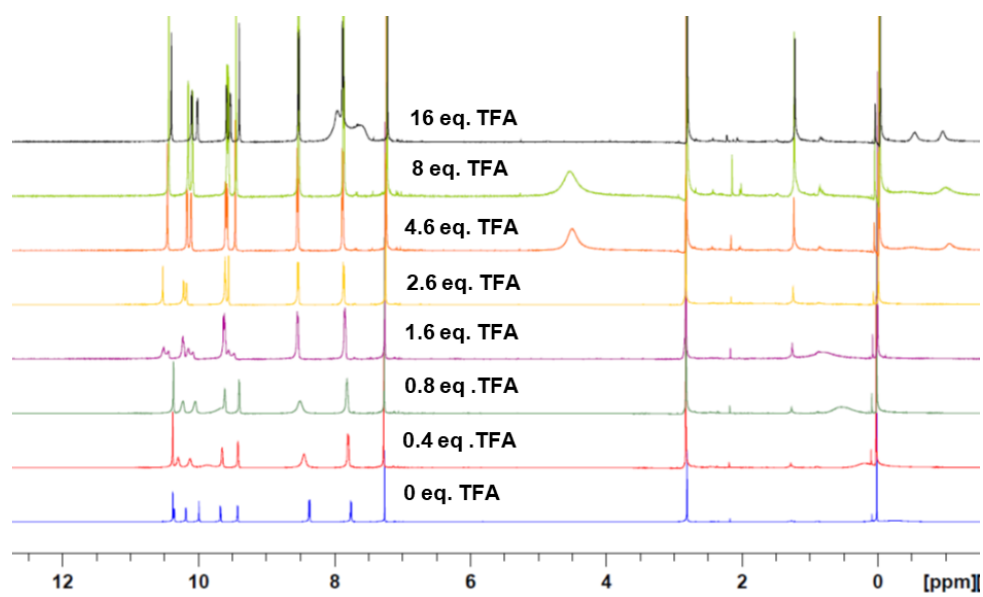

Figure S12:  $^1\text{H}$  NMR spectra of compound **8** in  $\text{CDCl}_3$  titrated with TFA.

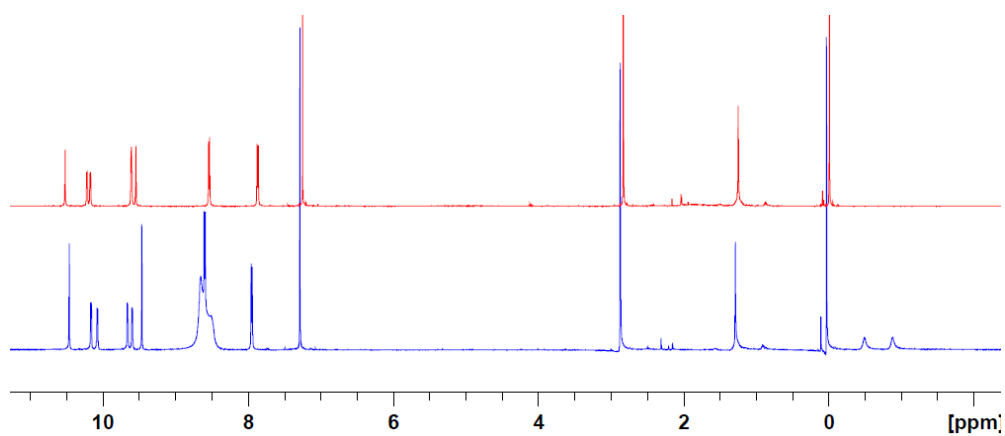

Figure S13:  $^1\text{H}$  NMR spectra of **8.2TFA** (blue) and **8.2TFA** with  $\text{D}_2\text{O}$  (red) in  $\text{CDCl}_3$ .

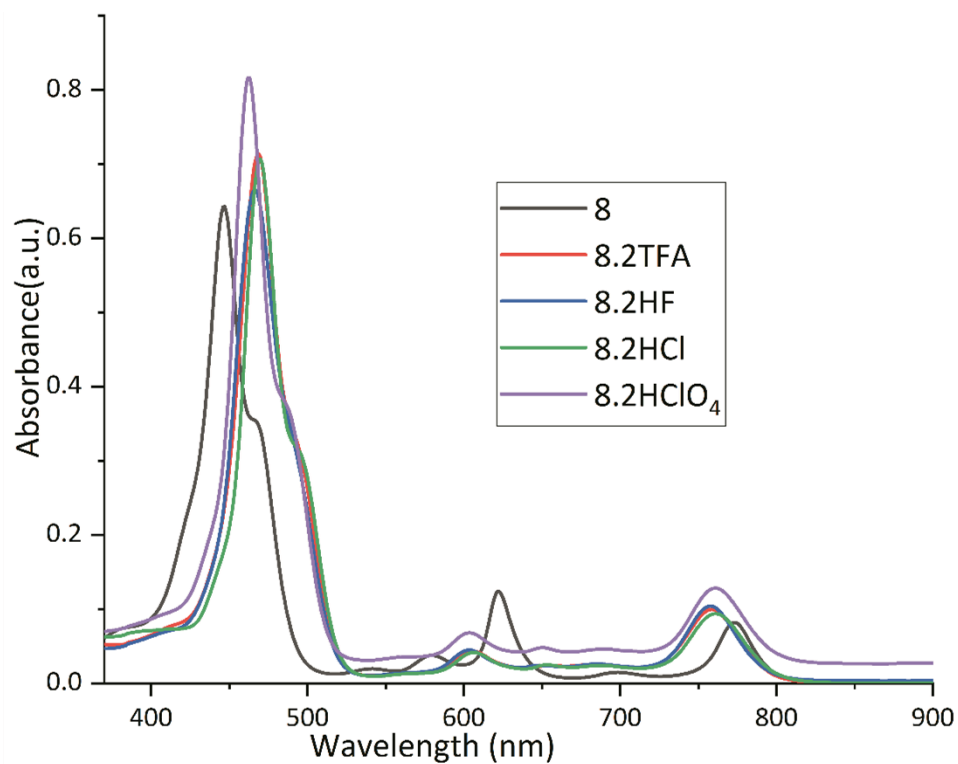

**Figure S14:** UV-vis-NIR absorption spectra of **8** ( $2 \mu\text{M}$  in  $\text{CHCl}_3$ ) protonated with acids (methanolic solution).

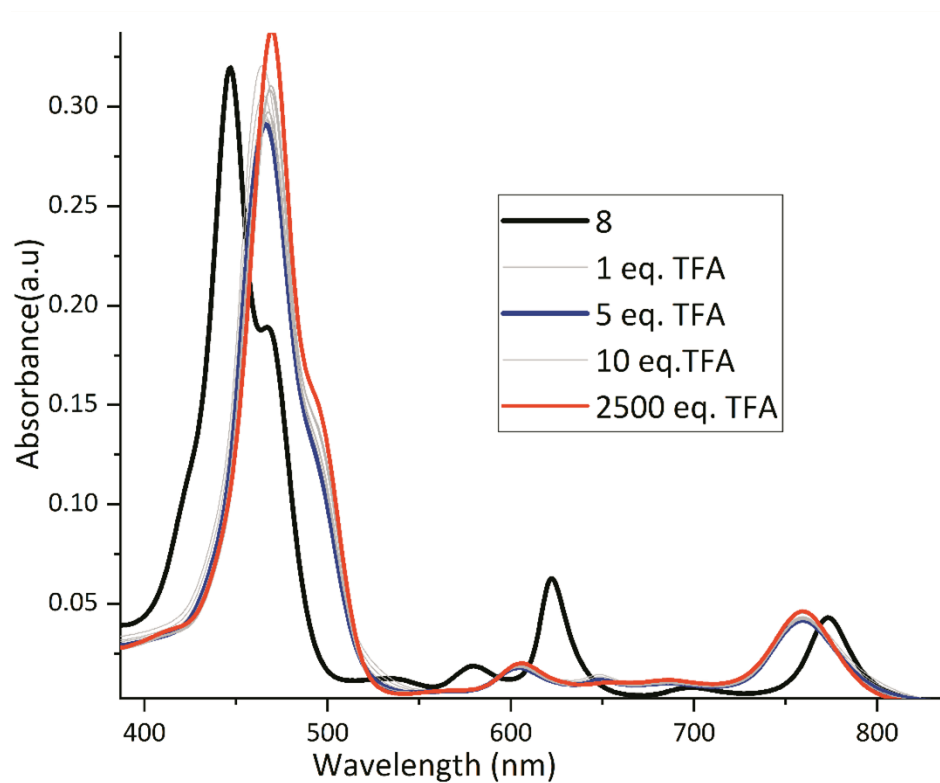

**Figure S15:** UV-vis-NIR spectra of compound **8** ( $1 \mu\text{M}$  in  $\text{CHCl}_3$ ) titration against TFA (in  $\text{CHCl}_3$ ).

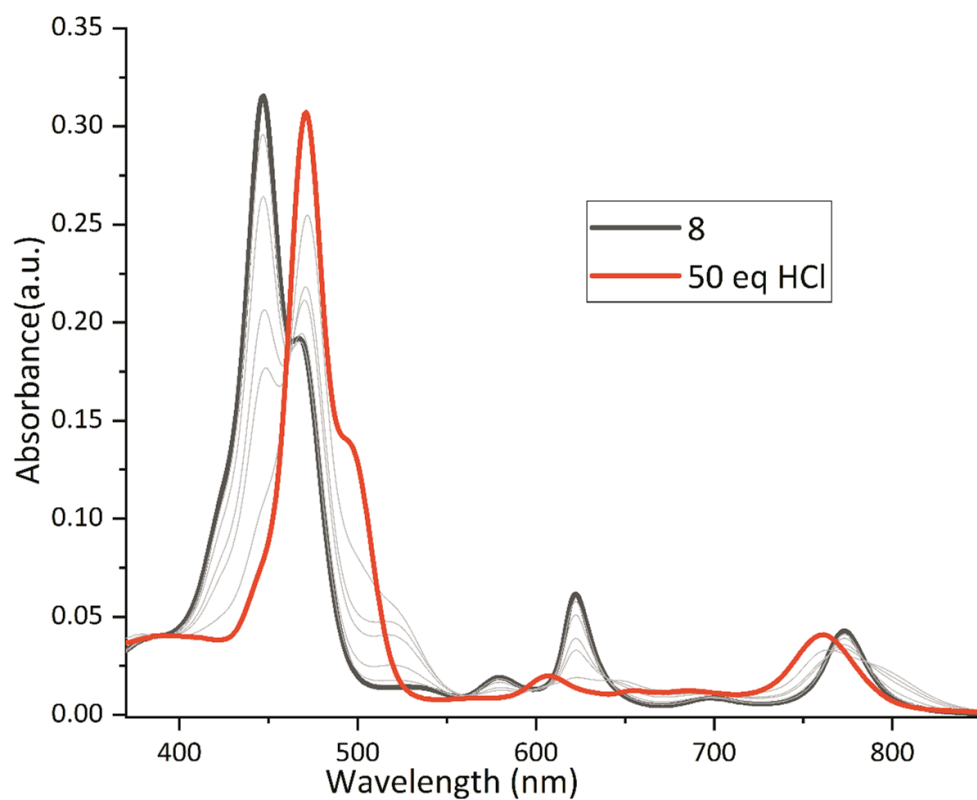

**Figure S16:** UV-vis-NIR spectra of compound **8** ( $1 \mu\text{M}$  in  $\text{CHCl}_3$ ) titration against HCl (in methanol).

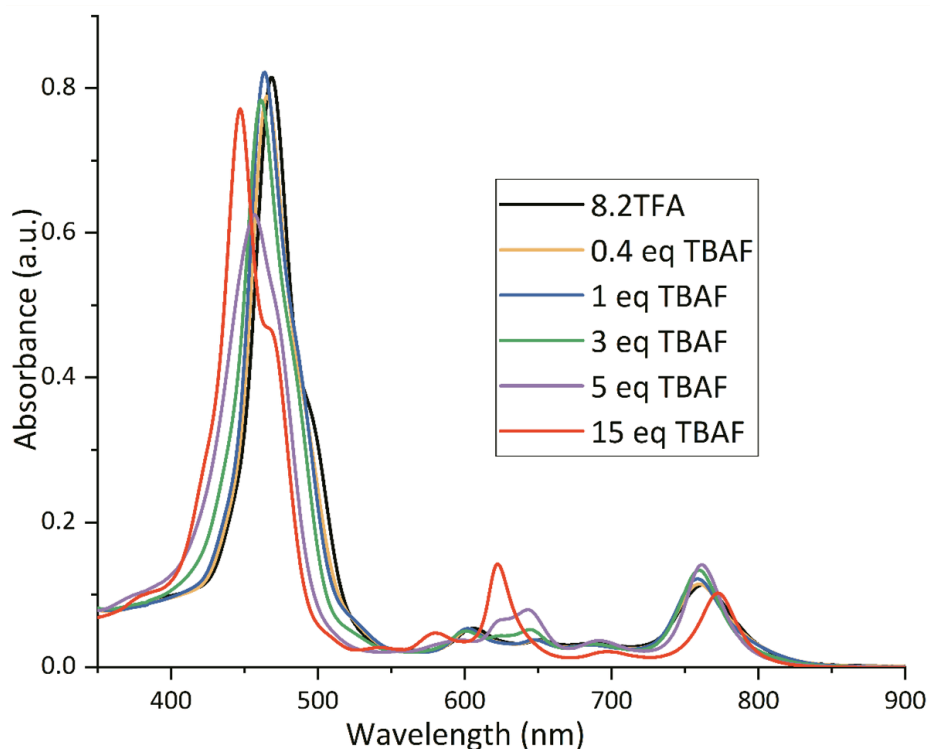

**Figure S17:** Fluoride binding with **8.TFA** ( $10 \mu\text{M}$ ) using  $\text{TBAF} \cdot 3\text{H}_2\text{O}$  in  $\text{CHCl}_3$ .

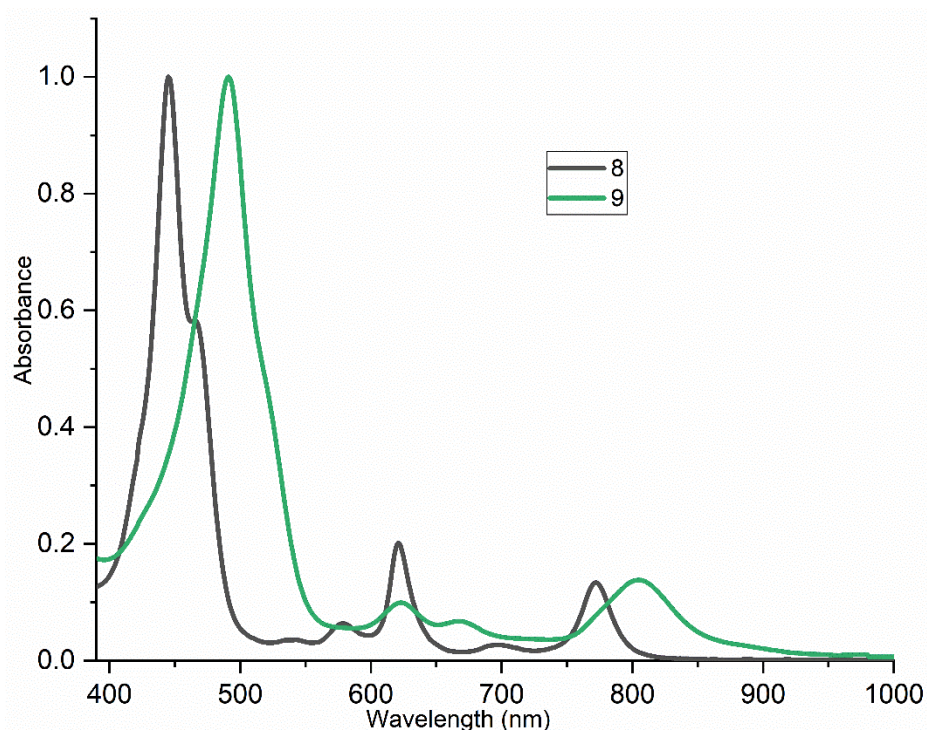

Figure S18: UV-vis-NIR spectra of **8** and **9** in  $\text{CHCl}_3$ .

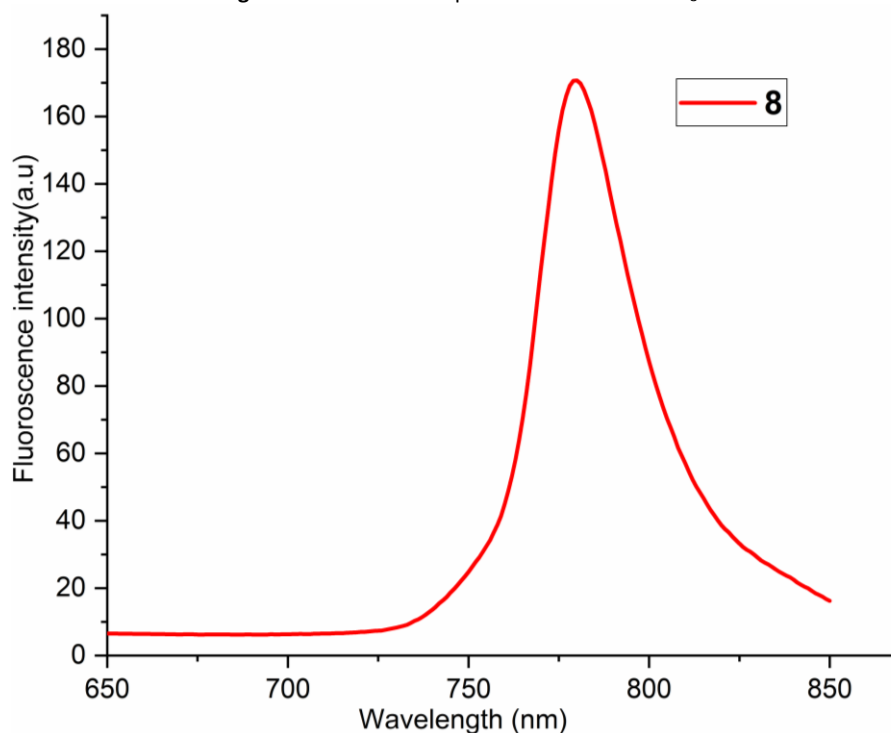

Figure S19: Emission spectrum of **8** in chloroform ( $\lambda_{\text{ex}}$ : 428 nm).

## Computational studies

All quantum mechanical calculations are performed by Gaussian 09 programme<sup>54</sup> provided by CMSD facility at University of Hyderabad. Ground state optimisation has been performed by density functional theory (DFT) using Becke's three-parameter hybrid exchange functional and the Lee-Yang-Parr correlation functional (B3LYP) employing 6-31G(D,P) basis set for C, H, N, S and LANL2DZ for Pd atom. The NICS values were obtained with gauge independent atomic orbital (GIAO) method based on the optimized geometries.<sup>55</sup> HOMA (Harmonic Oscillator Model of Aromaticity) indices were calculated by using  $\text{Ropt}(\text{C-C}) = 1.388 \text{ \AA}$  and  $\text{Ropt} = 1.334 \text{ \AA}$ .<sup>56-58</sup> The molecular orbitals were visualized using Gauss view 5.

| Front view                                                                                               | Side views                                                                          | Optimized energy difference in gas phase (kcal/mol) | HOMO-LUMO gap (kcal/mol) | Optimized energy difference in CHCl <sub>3</sub> (kcal/mol) |
|----------------------------------------------------------------------------------------------------------|-------------------------------------------------------------------------------------|-----------------------------------------------------|--------------------------|-------------------------------------------------------------|
| 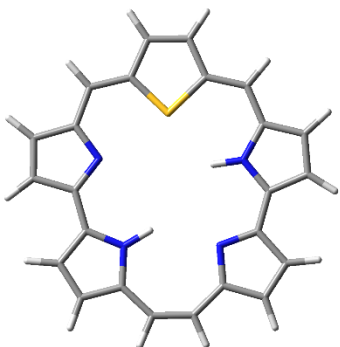 <p><b>8-trans</b></p>  |    | 0                                                   | 48.66                    | 0                                                           |
|  <p><b>8-cis1</b></p>  |   | 12.9                                                | 48.20                    | 10.37                                                       |
|  <p><b>8-cis2</b></p> |  | 6.68                                                | 48.20                    | 5.07                                                        |
|  <p><b>8-cis3</b></p> |  | 4.15                                                | 50.73                    | 3.22                                                        |

**Table S1:** Optimised properties of different tautomers of **8** (tolyl groups are removed for clarity).

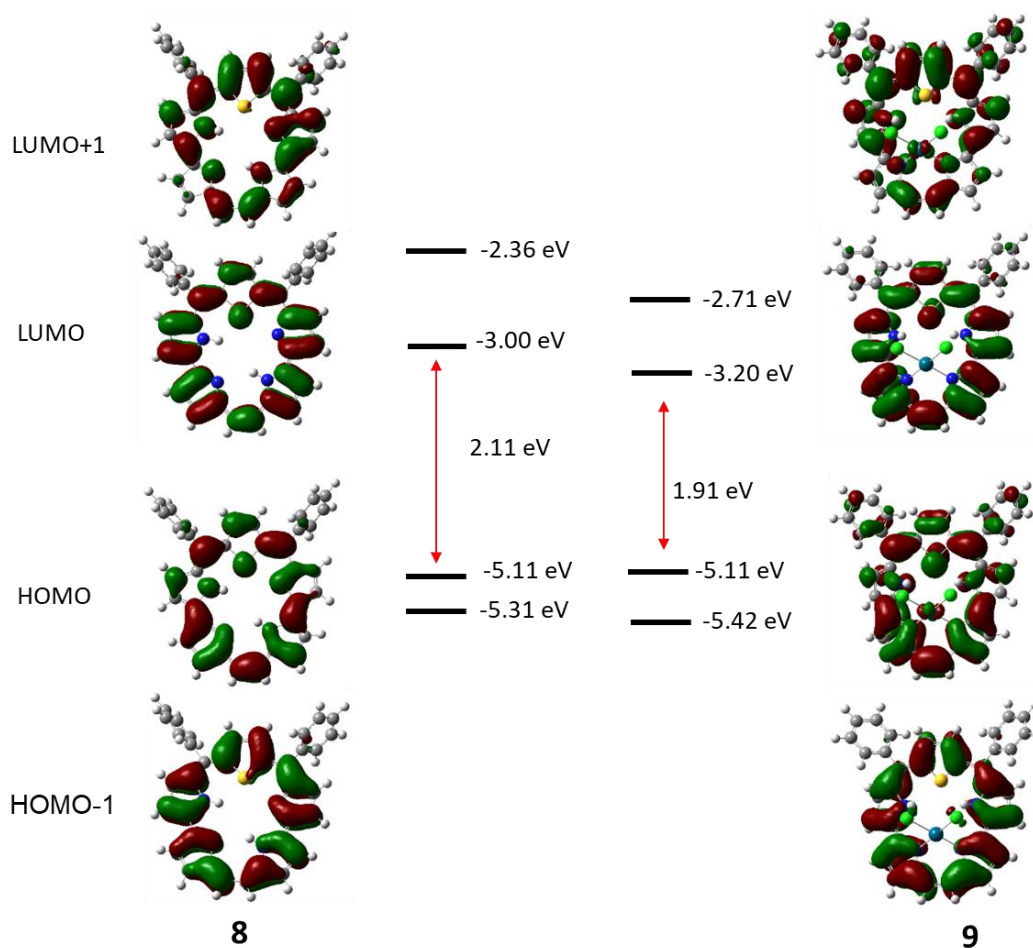

Figure S20: Frontier orbital diagram of **8** and **9**.

| Front View        | Side Views | Relative energies(kcal/mol) |
|-------------------|------------|-----------------------------|
| <p><b>8.H</b></p> |            | 0                           |
|                   |            | 4.76                        |



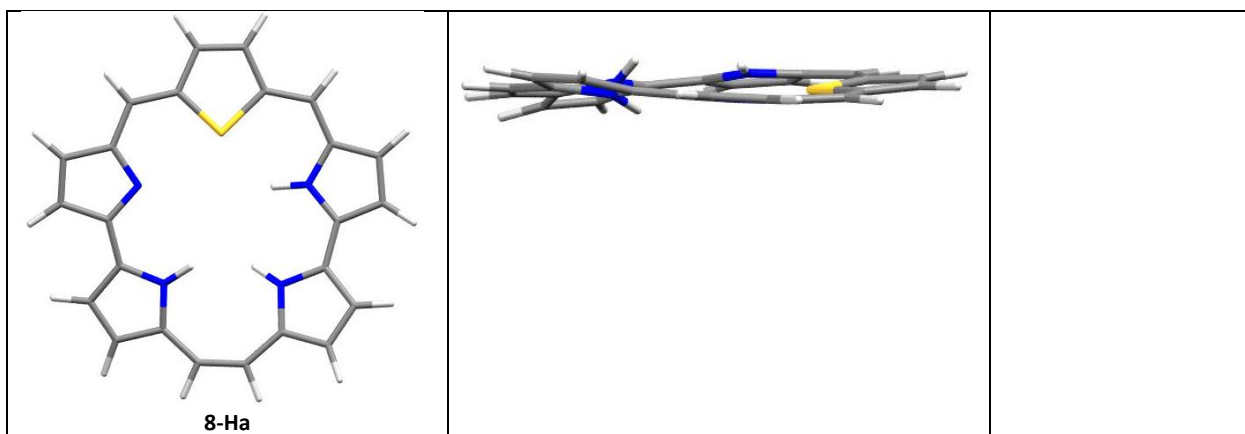

**Table S2:** Relative energies of optimized geometries of different modes of mono-protonation of **8** in chloroform (tolyl groups are removed for clarity).

| Front View                                                                                                                       | Side Views                                                                           | Relative energies (kcal/mol) |
|----------------------------------------------------------------------------------------------------------------------------------|--------------------------------------------------------------------------------------|------------------------------|
| 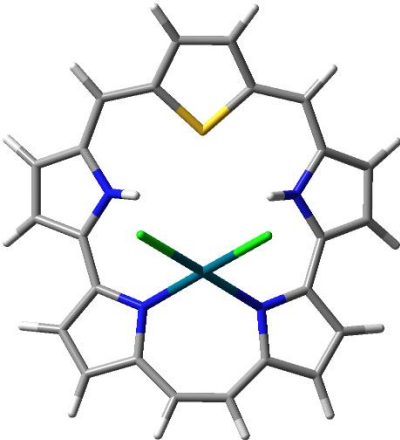 <p style="text-align: center;"><b>9</b></p>   |   | 0                            |
|  <p style="text-align: center;"><b>9'</b></p> |  | 9.68                         |

**Table S3:** Relative energies of conformations having different mode of binding of Pd to **8** (tolyl groups are removed for clarity).

**Table S4:** Coordinates of optimized geometry of 1:

| Label | Symbol | X        | Y        | Z        | Label | Symbol | X        | Y        | Z        |
|-------|--------|----------|----------|----------|-------|--------|----------|----------|----------|
| 1     | C      | 1.13788  | 3.423046 | 0.000396 | 24    | C      | 4.671015 | 1.920132 | 0.000252 |
| 2     | C      | 0.682926 | 4.785286 | 0.00042  | 25    | C      | 3.210254 | 1.878127 | 0.000322 |
| 3     | C      | -0.68286 | 4.785294 | 0.000054 | 26    | N      | 2.753893 | 0.595952 | 0.000047 |
| 4     | C      | -1.13782 | 3.423058 | -0.00016 | 27    | C      | 2.486453 | 3.084017 | 0.000561 |
| 5     | N      | 0.000022 | 2.632457 | 0.000069 | 28    | C      | -3.93064 | -1.57914 | 0.000252 |
| 6     | C      | -3.88673 | -0.18532 | -7.8E-05 | 29    | C      | 3.930612 | -1.57919 | -0.0005  |
| 7     | C      | -5.09211 | 0.63036  | -0.00035 | 30    | H      | 1.347371 | 5.638613 | 0.000667 |
| 8     | C      | -4.67098 | 1.9202   | -0.00061 | 31    | H      | -1.34729 | 5.638629 | -4.3E-05 |
| 9     | C      | -3.21022 | 1.878171 | -0.00045 | 32    | H      | 0.000018 | 1.623225 | -4.9E-05 |
| 10    | N      | -2.75389 | 0.595987 | -0.00017 | 33    | H      | -6.10569 | 0.24956  | -0.00036 |
| 11    | C      | -2.4864  | 3.084049 | -0.00047 | 34    | H      | -5.26758 | 2.823903 | -0.00087 |
| 12    | C      | -0.70578 | -3.18045 | 0.000269 | 35    | H      | -3.12346 | 3.964648 | -0.00067 |
| 13    | C      | -1.55291 | -4.32334 | 0.000602 | 36    | H      | -1.20868 | -5.34731 | 0.000781 |
| 14    | C      | -2.86299 | -3.88535 | 0.000693 | 37    | H      | -3.75812 | -4.4919  | 0.000945 |
| 15    | C      | -2.84943 | -2.46377 | 0.000418 | 38    | H      | -1.28612 | -1.08701 | -7.5E-05 |
| 16    | N      | -1.5245  | -2.07581 | 0.000193 | 39    | H      | 1.208601 | -5.34733 | -0.00033 |
| 17    | C      | 0.705726 | -3.18046 | 0.000007 | 40    | H      | 3.758054 | -4.49195 | -0.00086 |
| 18    | C      | 1.552842 | -4.32337 | -0.00029 | 41    | H      | 1.286101 | -1.08703 | 0.000164 |
| 19    | C      | 2.862925 | -3.88539 | -0.00057 | 42    | H      | 6.105692 | 0.249469 | -0.0003  |
| 20    | C      | 2.84939  | -2.46381 | -0.00044 | 43    | H      | 5.267626 | 2.823826 | 0.000441 |
| 21    | N      | 1.524465 | -2.07583 | -0.00012 | 44    | H      | 3.123522 | 3.964607 | 0.000825 |
| 22    | C      | 3.886727 | -0.18537 | -0.00023 | 45    | H      | -4.9149  | -2.03775 | 0.000372 |
| 23    | C      | 5.09212  | 0.630286 | -0.00012 | 46    | H      | 4.914866 | -2.03782 | -0.00074 |

**Table S5:** Coordinates of optimized geometry of 2:

| Label | Symbol | X         | Y         | Z         | Label | Symbol | X         | Y         | Z         |
|-------|--------|-----------|-----------|-----------|-------|--------|-----------|-----------|-----------|
| 1     | C      | -1.129715 | 2.888314  | 0.000583  | 24    | C      | -2.413416 | 2.312226  | 0.000387  |
| 2     | C      | -0.692927 | 4.243636  | 0.000344  | 25    | N      | -2.595623 | 0.962673  | 0.000021  |
| 3     | C      | 0.692776  | 4.243665  | -0.000023 | 26    | C      | 4.199282  | -1.756075 | 0.000194  |
| 4     | C      | 1.129634  | 2.888357  | 0.000014  | 27    | C      | -4.199181 | -1.756131 | -0.000386 |
| 5     | N      | -0.000014 | 2.117153  | 0.000489  | 28    | C      | 4.63919   | -0.443263 | -0.000108 |
| 6     | C      | 3.947799  | 0.783671  | -0.000283 | 29    | C      | -4.639201 | -0.443354 | -0.00059  |
| 7     | C      | 4.637645  | 2.062075  | -0.000628 | 30    | H      | -1.344023 | 5.106147  | 0.000509  |
| 8     | C      | 3.670342  | 3.025883  | -0.000557 | 31    | H      | 1.343841  | 5.106199  | -0.000318 |
| 9     | C      | 2.413374  | 2.31235   | -0.00022  | 32    | H      | -0.000016 | 1.111     | 0.000127  |
| 10    | N      | 2.595597  | 0.962745  | -0.000128 | 33    | H      | 5.712229  | 2.194139  | -0.000831 |
| 11    | C      | 0.71388   | -2.85653  | 0.000159  | 34    | H      | 3.795722  | 4.100451  | -0.000695 |
| 12    | C      | 1.446223  | -4.08365  | 0.000341  | 35    | H      | 1.011245  | -5.069663 | 0.000277  |
| 13    | C      | 2.787641  | -3.793923 | 0.000457  | 36    | H      | 3.611179  | -4.494427 | 0.000583  |
| 14    | C      | 2.935816  | -2.382249 | 0.000292  | 37    | H      | 1.547796  | -0.82154  | 0.000062  |
| 15    | N      | 1.657392  | -1.841635 | 0.000088  | 38    | H      | -1.011151 | -5.069674 | 0.000247  |
| 16    | C      | -0.713807 | -2.856549 | 0.000087  | 39    | H      | -3.61114  | -4.494453 | -0.00059  |
| 17    | C      | -1.446169 | -4.083679 | -0.00002  | 40    | H      | -1.547714 | -0.82157  | -0.000085 |
| 18    | C      | -2.787573 | -3.793979 | -0.000345 | 41    | H      | -5.712265 | 2.19409   | -0.000099 |
| 19    | C      | -2.935743 | -2.382286 | -0.000253 | 42    | H      | -3.795746 | 4.100383  | 0.000794  |
| 20    | N      | -1.657317 | -1.841659 | 0.000031  | 43    | H      | 4.998017  | -2.494102 | 0.000328  |

|    |   |           |          |           |    |   |           |           |           |
|----|---|-----------|----------|-----------|----|---|-----------|-----------|-----------|
| 21 | C | -3.947866 | 0.783603 | -0.000214 | 44 | H | 5.721257  | -0.333586 | -0.000204 |
| 22 | C | -4.637681 | 2.06201  | -0.000033 | 45 | H | -5.721264 | -0.33378  | -0.000877 |
| 23 | C | -3.670373 | 3.025816 | 0.00045   | 46 | H | -4.997899 | -2.494185 | -0.000615 |

**Table S6:** Coordinates of optimized geometry of 3:

| Label | Symbol | X         | Y         | Z         | Label | Symbol | X        | Y        | Z        |
|-------|--------|-----------|-----------|-----------|-------|--------|----------|----------|----------|
| 1     | C      | -4.403494 | 1.310985  | 0.000007  | 24    | N      | 2.741451 | 1.443464 | -7E-06   |
| 2     | C      | -4.126718 | -0.057968 | -0.000005 | 25    | C      | 2.577124 | 2.804757 | 0.000016 |
| 3     | N      | -2.835334 | -0.557149 | -0.000038 | 26    | C      | 3.880668 | 3.36567  | 0.000039 |
| 4     | C      | -2.925621 | -1.892387 | -0.000009 | 27    | C      | 4.80243  | 2.320942 | 0.000028 |
| 5     | C      | -4.313905 | -2.317508 | 0.000037  | 28    | C      | 0.149711 | 2.698223 | -8.2E-05 |
| 6     | C      | -5.062321 | -1.169318 | 0.000041  | 29    | C      | 1.296287 | 3.441997 | 0.000009 |
| 7     | C      | -1.731082 | -2.681655 | -0.000008 | 30    | H      | -5.44041 | 1.63243  | 0.000054 |
| 8     | N      | -0.498405 | -2.073796 | -0.000025 | 31    | H      | -4.6717  | -3.33868 | 0.000065 |
| 9     | C      | 0.51412   | -2.996352 | -0.000006 | 32    | H      | -6.14203 | -1.08711 | 0.00007  |
| 10    | C      | -0.104548 | -4.266216 | 0.000023  | 33    | H      | -0.35794 | -1.07616 | -3.8E-05 |
| 11    | C      | -1.490535 | -4.071158 | 0.000022  | 34    | H      | 0.414276 | -5.2143  | 0.000041 |
| 12    | C      | 1.894056  | -2.61395  | -0.000003 | 35    | H      | -2.2525  | -4.83784 | 0.000038 |
| 13    | N      | 2.293745  | -1.330427 | -0.000004 | 36    | H      | 5.17698  | -3.05912 | 0.000001 |
| 14    | C      | 3.68066   | -1.364237 | -0.000002 | 37    | H      | 2.971388 | -4.60745 | 0        |
| 15    | C      | 4.141614  | -2.742039 | 0         | 38    | H      | 5.576038 | -0.40764 | 0.00001  |
| 16    | C      | 3.024336  | -3.526876 | -0.000001 | 39    | H      | -4.28085 | 4.357883 | 0.000119 |
| 17    | C      | 4.502789  | -0.240986 | 0.000003  | 40    | H      | -1.72775 | 5.190419 | 0.000091 |
| 18    | C      | -3.395316 | 2.305973  | -0.000022 | 41    | H      | -1.86137 | 0.929505 | -0.00011 |
| 19    | C      | 4.073936  | 1.103037  | 0.000004  | 42    | H      | 2.045767 | 0.699008 | 0.00001  |
| 20    | C      | -3.397995 | 3.732657  | 0.000057  | 43    | H      | 4.095602 | 4.425563 | 0.000053 |
| 21    | C      | -2.072139 | 4.165676  | 0.000045  | 44    | H      | 5.880931 | 2.401435 | 0.000035 |
| 22    | C      | -1.23907  | 3.009732  | -0.000049 | 45    | H      | 0.294179 | 1.620176 | -0.00019 |
| 23    | N      | -2.079913 | 1.936469  | -0.000099 | 46    | H      | 1.278639 | 4.527973 | 0.000092 |

**Table S7:** Coordinates of optimized geometry of 4:

| Label | Symbol | X         | Y         | Z         | Label | Symbol | X         | Y         | Z         |
|-------|--------|-----------|-----------|-----------|-------|--------|-----------|-----------|-----------|
| 1     | C      | 0.806784  | -3.043877 | -0.000336 | 24    | C      | 4.343076  | -2.438044 | -0.001126 |
| 2     | C      | 0.438406  | -4.422792 | -0.000388 | 25    | C      | 3.764328  | -1.10777  | -0.000454 |
| 3     | C      | -0.93378  | -4.496766 | 0.000361  | 26    | N      | 2.400978  | -1.16597  | -0.000208 |
| 4     | C      | -1.464015 | -3.168065 | 0.000684  | 27    | C      | 4.601099  | 0.034215  | 0.000091  |
| 5     | N      | -0.362973 | -2.321055 | 0.000228  | 28    | C      | 4.361786  | 1.393027  | 0.000845  |
| 6     | C      | -3.973022 | 0.584305  | -0.00016  | 29    | H      | 1.135472  | -5.247431 | -0.000876 |
| 7     | C      | -5.207749 | -0.124883 | 0.000192  | 30    | H      | -1.544628 | -5.38927  | 0.000537  |
| 8     | C      | -4.916456 | -1.472869 | 0.000791  | 31    | H      | -6.184438 | 0.339055  | -0.000006 |
| 9     | C      | -3.495296 | -1.629068 | 0.000808  | 32    | H      | -5.615587 | -2.298073 | 0.001172  |
| 10    | C      | -2.818903 | -2.853594 | 0.001084  | 33    | H      | -0.550422 | 5.267089  | -0.001425 |
| 11    | C      | -0.365681 | 2.997764  | -0.000343 | 34    | H      | -3.182153 | 4.754968  | -0.002046 |
| 12    | C      | -1.030959 | 4.299836  | -0.001096 | 35    | H      | 1.585757  | 5.078609  | 0.001175  |
| 13    | C      | -2.364393 | 4.045551  | -0.001447 | 36    | H      | 4.118871  | 4.201165  | 0.002114  |
| 14    | C      | -2.502987 | 2.601145  | -0.000891 | 37    | H      | 3.339351  | -4.395899 | -0.001709 |
| 15    | N      | -1.263465 | 1.987029  | -0.000246 | 38    | H      | 5.402792  | -2.659586 | -0.001441 |
| 16    | C      | 1.054606  | 2.914724  | 0.000269  | 39    | H      | 5.657752  | -0.224618 | -0.000025 |
| 17    | C      | 1.914095  | 4.050984  | 0.000964  | 40    | H      | 5.258462  | 2.008314  | 0.001336  |

|    |   |           |           |           |    |   |           |           |           |
|----|---|-----------|-----------|-----------|----|---|-----------|-----------|-----------|
| 18 | C | 3.216676  | 3.605163  | 0.001492  | 41 | H | 1.598733  | 0.812111  | -0.000017 |
| 19 | C | 3.192919  | 2.184643  | 0.000955  | 42 | H | -0.363322 | -1.312572 | 0.000796  |
| 20 | N | 1.86813   | 1.799412  | 0.000331  | 43 | N | -2.966318 | -0.355242 | 0.000217  |
| 21 | C | -3.740742 | 1.963268  | -0.000789 | 44 | H | -2.001075 | -0.035155 | 0.000209  |
| 22 | C | 2.104649  | -2.499129 | -0.00064  | 45 | H | -4.621708 | 2.597732  | -0.001197 |
| 23 | C | 3.299561  | -3.315304 | -0.001258 | 46 | H | -3.472332 | -3.720455 | 0.001499  |

**Table S8:** Coordinates of optimized geometry of **8-trans**:

| Label | Symbol | X        | Y        | Z        | Label | Symbol | X        | Y        | Z        |
|-------|--------|----------|----------|----------|-------|--------|----------|----------|----------|
| 1     | C      | 2.782798 | 2.63726  | -0.00108 | 34    | H      | -3.63534 | 2.422627 | -0.00903 |
| 2     | C      | 2.642509 | 4.057078 | 0.054295 | 35    | H      | 0.316997 | -5.83795 | -0.08665 |
| 3     | C      | 1.298931 | 4.352392 | 0.057504 | 36    | H      | -2.22752 | -5.00789 | -0.09414 |
| 4     | C      | 0.559426 | 3.125389 | 0.000142 | 37    | H      | 2.570975 | -5.83642 | -0.00859 |
| 5     | N      | 1.515938 | 2.118437 | -0.03542 | 38    | H      | 5.163934 | -5.12801 | -0.01837 |
| 6     | C      | -2.29509 | -0.67861 | 0.002646 | 39    | H      | 2.847753 | -1.59205 | 0.009348 |
| 7     | C      | -3.35348 | 0.262024 | 0.004982 | 40    | H      | 5.507776 | 3.533421 | 0.016589 |
| 8     | C      | -2.94928 | 1.585233 | 0.000715 | 41    | H      | 7.24436  | 1.469424 | 0.00262  |
| 9     | C      | -1.54286 | 1.754203 | 0.011326 | 42    | H      | 7.092724 | -0.93136 | -0.01809 |
| 10    | S      | -0.75764 | 0.173061 | 0.022565 | 43    | H      | 6.438059 | -3.06549 | -0.01868 |
| 11    | C      | -0.83972 | 2.977899 | 0.009913 | 44    | C      | -4.28469 | -3.34899 | 1.101117 |
| 12    | C      | 0.775972 | -3.6071  | 0.00723  | 45    | C      | -5.56418 | -3.91027 | 1.079207 |
| 13    | C      | -0.04116 | -4.81877 | -0.04465 | 46    | C      | -6.35421 | -3.81468 | -0.06955 |
| 14    | C      | -1.33513 | -4.40016 | -0.04625 | 47    | C      | -5.85708 | -3.15387 | -1.19658 |
| 15    | C      | -1.28977 | -2.94421 | 0.010752 | 48    | C      | -4.57933 | -2.58975 | -1.17323 |
| 16    | N      | 0.00906  | -2.503   | 0.041494 | 49    | C      | -3.7763  | -2.682   | -0.02487 |
| 17    | C      | 2.195255 | -3.64437 | 0.004906 | 50    | H      | -3.67412 | -3.42128 | 1.996436 |
| 18    | C      | 2.973705 | -4.8349  | -0.0065  | 51    | H      | -5.94271 | -4.42018 | 1.960584 |
| 19    | C      | 4.302438 | -4.47455 | -0.01087 | 52    | H      | -7.34821 | -4.25217 | -0.08702 |
| 20    | C      | 4.377479 | -3.05303 | -0.005   | 53    | H      | -6.46144 | -3.0798  | -2.09625 |
| 21    | N      | 3.079724 | -2.58342 | 0.006965 | 54    | H      | -4.19256 | -2.084   | -2.05331 |
| 22    | C      | -2.40228 | -2.08547 | -0.00058 | 55    | C      | -1.65048 | 4.241635 | 0.026141 |
| 23    | C      | 3.9675   | 1.87303  | -0.00572 | 56    | C      | -2.29817 | 4.659577 | 1.199214 |
| 24    | C      | 5.285916 | 2.475081 | 0.006421 | 57    | C      | -3.05178 | 5.836007 | 1.21552  |
| 25    | C      | 6.162281 | 1.433414 | -0.00152 | 58    | C      | -3.17215 | 6.608982 | 0.057118 |
| 26    | C      | 5.361429 | 0.218654 | -0.01427 | 59    | C      | -2.53359 | 6.199776 | -1.11672 |
| 27    | N      | 4.029038 | 0.508716 | -0.01859 | 60    | C      | -1.77762 | 5.024528 | -1.13172 |
| 28    | C      | 6.009964 | -1.03933 | -0.01586 | 61    | H      | -2.20234 | 4.062041 | 2.101312 |
| 29    | C      | 5.607904 | -2.3626  | -0.01348 | 62    | H      | -3.54191 | 6.148446 | 2.133205 |
| 30    | H      | 3.461156 | 4.760134 | 0.097561 | 63    | H      | -3.75906 | 7.522821 | 0.069181 |
| 31    | H      | 0.847556 | 5.331882 | 0.106369 | 64    | H      | -2.62417 | 6.792924 | -2.02226 |
| 32    | H      | 1.348971 | 1.123893 | -0.08921 | 65    | H      | -1.28531 | 4.706392 | -2.04629 |
| 33    | H      | -4.39056 | -0.0486  | 0.008193 |       |        |          |          |          |

**Table S9:** Coordinates of optimized geometry of **8-cis-1**:

|       |        |          |          |          |       |        |          |          |          |
|-------|--------|----------|----------|----------|-------|--------|----------|----------|----------|
| Label | Symbol | X        | Y        | Z        | Label | Symbol | X        | Y        | Z        |
| 1     | C      | -1.90274 | -3.43756 | -0.14224 | 33    | H      | -1.91848 | 5.643807 | -0.41792 |
| 2     | C      | -1.34708 | -4.73332 | -0.30249 | 34    | H      | 0.752894 | 5.397357 | -0.41604 |

|    |   |          |          |          |    |   |          |          |          |
|----|---|----------|----------|----------|----|---|----------|----------|----------|
| 3  | C | 0.029917 | -4.6067  | -0.29767 | 35 | H | -4.36411 | 5.012324 | -0.14011 |
| 4  | C | 0.3586   | -3.22696 | -0.13159 | 36 | H | -6.52689 | 3.421095 | 0.113632 |
| 5  | N | -0.85213 | -2.55948 | -0.05754 | 37 | H | -4.36155 | -5.01448 | -0.14136 |
| 6  | C | 1.954552 | 1.289536 | -0.04307 | 38 | H | -6.52516 | -3.42439 | 0.112277 |
| 7  | C | 3.212144 | 0.689493 | 0.243786 | 39 | H | -6.92503 | -1.09392 | 0.30833  |
| 8  | C | 3.212504 | -0.68781 | 0.243837 | 40 | H | -6.92556 | 1.090346 | 0.308788 |
| 9  | C | 1.955236 | -1.28852 | -0.04301 | 41 | C | 2.946482 | 4.457185 | 1.156222 |
| 10 | S | 0.787366 | 0.00018  | -0.38306 | 42 | C | 4.020299 | 5.346123 | 1.244967 |
| 11 | C | 1.655121 | -2.65773 | -0.05532 | 43 | C | 4.965953 | 5.41089  | 0.217719 |
| 12 | C | -1.90452 | 3.436663 | -0.14204 | 44 | C | 4.832315 | 4.579589 | -0.89808 |
| 13 | C | -1.34952 | 4.732685 | -0.30229 | 45 | C | 3.761604 | 3.686861 | -0.98384 |
| 14 | C | 0.027556 | 4.60671  | -0.29764 | 46 | C | 2.80343  | 3.615394 | 0.040813 |
| 15 | C | 0.356896 | 3.227131 | -0.13171 | 47 | H | 2.2158   | 4.406319 | 1.95808  |
| 16 | N | -0.8535  | 2.559053 | -0.05749 | 48 | H | 4.118626 | 5.985286 | 2.117763 |
| 17 | C | -3.25595 | 3.026383 | -0.05838 | 49 | H | 5.799675 | 6.103637 | 0.28591  |
| 18 | C | -4.39668 | 3.933867 | -0.06003 | 50 | H | 5.559023 | 4.627307 | -1.70406 |
| 19 | C | -5.48431 | 3.131059 | 0.07055  | 51 | H | 3.656483 | 3.045804 | -1.85431 |
| 20 | C | -4.98486 | 1.750941 | 0.132241 | 52 | C | 2.805303 | -3.61396 | 0.041047 |
| 21 | N | -3.6229  | 1.73269  | 0.056139 | 53 | C | 2.948742 | -4.45554 | 1.156593 |
| 22 | C | 1.653725 | 2.658559 | -0.05547 | 54 | C | 4.022977 | -5.34395 | 1.245484 |
| 23 | C | -3.25437 | -3.02799 | -0.05877 | 55 | C | 4.968684 | -5.40841 | 0.218258 |
| 24 | C | -4.39465 | -3.93606 | -0.06094 | 56 | C | 4.83466  | -4.57734 | -0.89766 |
| 25 | C | -5.48271 | -3.13384 | 0.069573 | 57 | C | 3.763521 | -3.68514 | -0.98358 |
| 26 | C | -4.98396 | -1.75347 | 0.131779 | 58 | H | 2.218046 | -4.4049  | 1.958448 |
| 27 | N | -3.62201 | -1.73452 | 0.056099 | 59 | H | 4.121608 | -5.98295 | 2.118368 |
| 28 | C | -5.91156 | -0.70153 | 0.235173 | 60 | H | 5.802733 | -6.10075 | 0.286528 |
| 29 | C | -5.9119  | 0.698483 | 0.235412 | 61 | H | 5.561404 | -4.62483 | -1.70362 |
| 30 | H | 0.755615 | -5.39703 | -0.41602 | 62 | H | 3.658074 | -3.04427 | -1.85415 |
| 31 | H | 4.08323  | 1.286661 | 0.480905 | 63 | H | -1.01111 | 1.577446 | 0.129126 |
| 32 | H | 4.083921 | -1.28452 | 0.480889 | 64 | H | -1.01017 | -1.578   | 0.129426 |
|    |   |          |          |          | 65 | H | -1.9156  | -5.64471 | -0.41819 |

**Table S10:** Coordinates of optimized geometry of **8-cis-2**:

| Label | Symbol | X        | Y        | Z        | Label | Symbol | X        | Y        | Z        |
|-------|--------|----------|----------|----------|-------|--------|----------|----------|----------|
| 1     | C      | -0.97388 | -3.45446 | -0.05094 | 34    | H      | -3.24118 | 4.821377 | -0.21117 |
| 2     | C      | -0.24173 | -4.73058 | 0.000627 | 35    | H      | -0.61613 | 5.323861 | -0.24247 |
| 3     | C      | 1.07851  | -4.41903 | 0.021242 | 36    | H      | -5.27356 | 3.711141 | 0.08095  |
| 4     | C      | 1.143842 | -2.9612  | -0.02911 | 37    | H      | -7.16482 | 1.799109 | 0.126668 |
| 5     | N      | -0.10689 | -2.41815 | -0.0723  | 38    | H      | -3.41545 | -0.14385 | 0.008282 |
| 6     | C      | 1.668064 | 1.687299 | -0.02712 | 39    | H      | -2.77172 | -5.64719 | -0.0991  |
| 7     | C      | 3.067243 | 1.448491 | 0.031749 | 40    | H      | -5.35191 | -4.91028 | -0.05881 |
| 8     | C      | 3.404448 | 0.109799 | 0.032717 | 41    | H      | -6.56721 | -2.84996 | 0.028189 |
| 9     | C      | 2.297768 | -0.78014 | -0.00469 | 42    | H      | -7.20808 | -0.68665 | 0.097988 |
| 10    | S      | 0.806506 | 0.144162 | -0.0884  | 43    | C      | 1.919607 | 5.013059 | 1.079225 |
| 11    | C      | 2.321641 | -2.18573 | 0.000663 | 44    | C      | 2.714125 | 6.162171 | 1.06673  |
| 12    | C      | -2.62213 | 2.693501 | 0.001915 | 45    | C      | 3.463044 | 6.486178 | -0.068   |
| 13    | C      | -2.44434 | 4.098256 | -0.12145 | 46    | C      | 3.414511 | 5.653121 | -1.18924 |
| 14    | C      | -1.08876 | 4.359197 | -0.137   | 47    | C      | 2.623336 | 4.501853 | -1.17494 |

|    |   |          |          |          |    |   |          |          |          |
|----|---|----------|----------|----------|----|---|----------|----------|----------|
| 15 | C | -0.38501 | 3.125916 | -0.02089 | 48 | C | 1.864712 | 4.168529 | -0.04126 |
| 16 | N | -1.36739 | 2.141111 | 0.057901 | 49 | H | 1.342769 | 4.761239 | 1.964451 |
| 17 | C | -3.85575 | 2.000583 | 0.038312 | 50 | H | 2.749516 | 6.80132  | 1.944354 |
| 18 | C | -5.12264 | 2.641835 | 0.070134 | 51 | H | 4.079751 | 7.380156 | -0.07825 |
| 19 | C | -6.09259 | 1.66354  | 0.097198 | 52 | H | 3.990191 | 5.899227 | -2.07692 |
| 20 | C | -5.4447  | 0.399537 | 0.077425 | 53 | H | 2.583179 | 3.858594 | -2.04922 |
| 21 | N | -4.08407 | 0.635858 | 0.048555 | 54 | C | 3.649914 | -2.87444 | 0.052484 |
| 22 | C | 1.016833 | 2.931958 | -0.02723 | 55 | C | 4.442546 | -2.82374 | 1.210814 |
| 23 | C | -2.39371 | -3.40583 | -0.05079 | 56 | C | 5.677403 | -3.4752  | 1.259293 |
| 24 | C | -3.16864 | -4.64357 | -0.06984 | 57 | C | 6.141259 | -4.18543 | 0.148355 |
| 25 | C | -4.4743  | -4.27637 | -0.05153 | 58 | C | 5.361476 | -4.24115 | -1.01008 |
| 26 | C | -4.48571 | -2.82266 | -0.01661 | 59 | C | 4.125533 | -3.59124 | -1.05747 |
| 27 | N | -3.21952 | -2.31321 | -0.02174 | 60 | H | 4.080012 | -2.2818  | 2.079626 |
| 28 | C | -5.73202 | -2.15289 | 0.02764  | 61 | H | 6.273443 | -3.43151 | 2.166479 |
| 29 | C | -6.13052 | -0.83052 | 0.070724 | 62 | H | 7.101159 | -4.69231 | 0.185769 |
| 30 | H | -0.67237 | -5.72048 | 0.035166 | 63 | H | 5.714397 | -4.78922 | -1.8791  |
| 31 | H | 1.920293 | -5.09466 | 0.076691 | 64 | H | 3.523415 | -3.63298 | -1.96044 |
| 32 | H | 3.793108 | 2.250587 | 0.077612 | 65 | H | -1.18798 | 1.15797  | 0.210808 |
| 33 | H | 4.42381  | -0.2535  | 0.065632 |    |   |          |          |          |

**Table S11:** Coordinates of optimized geometry of **8-cis3**:

| Label | Symbol | X        | Y        | Z        | Label | Symbol | X        | Y        | Z        |
|-------|--------|----------|----------|----------|-------|--------|----------|----------|----------|
| 1     | C      | 1.797309 | -3.40845 | -0.0417  | 34    | H      | 1.87435  | 5.67696  | 0.191728 |
| 2     | C      | 1.28586  | -4.77294 | -0.1068  | 35    | H      | -0.79917 | 5.456824 | 0.076235 |
| 3     | C      | -0.06858 | -4.66166 | -0.04325 | 36    | H      | 4.244591 | 4.970843 | 0.456514 |
| 4     | C      | -0.35901 | -3.23238 | 0.051544 | 37    | H      | 6.448017 | 3.415853 | 0.461896 |
| 5     | N      | 0.812874 | -2.50774 | 0.060127 | 38    | H      | 3.045714 | 1.011929 | -0.2707  |
| 6     | C      | -1.90108 | 1.263915 | -0.03262 | 39    | H      | 4.243963 | -4.97132 | -0.45681 |
| 7     | C      | -3.1905  | 0.692872 | -0.02405 | 40    | H      | 6.447581 | -3.41661 | -0.46214 |
| 8     | C      | -3.19058 | -0.69247 | 0.024544 | 41    | H      | 6.977573 | -1.09301 | -0.10824 |
| 9     | C      | -1.90124 | -1.26369 | 0.032851 | 42    | H      | 6.97771  | 1.092179 | 0.10811  |
| 10    | S      | -0.67142 | 0.000036 | 0.000159 | 43    | C      | -3.15776 | 4.295987 | -1.22213 |
| 11    | C      | -1.63417 | -2.66223 | 0.054739 | 44    | C      | -4.2497  | 5.168359 | -1.22897 |
| 12    | C      | 1.797733 | 3.408248 | 0.041565 | 45    | C      | -5.01179 | 5.348982 | -0.07183 |
| 13    | C      | 1.286444 | 4.772809 | 0.106545 | 46    | C      | -4.67713 | 4.650224 | 1.091883 |
| 14    | C      | -0.06801 | 4.661672 | 0.043071 | 47    | C      | -3.58891 | 3.774407 | 1.096881 |
| 15    | C      | -0.35861 | 3.232416 | -0.05156 | 48    | C      | -2.81434 | 3.589122 | -0.05939 |
| 16    | N      | 0.81319  | 2.507641 | -0.06014 | 49    | H      | -2.56678 | 4.156516 | -2.12272 |
| 17    | C      | 3.176868 | 3.062653 | 0.104181 | 50    | H      | -4.50298 | 5.705657 | -2.13852 |
| 18    | C      | 4.289495 | 3.901206 | 0.312255 | 51    | H      | -5.85905 | 6.028615 | -0.07619 |
| 19    | C      | 5.423967 | 3.100116 | 0.316891 | 52    | H      | -5.26093 | 4.787957 | 1.997619 |
| 20    | C      | 5.031219 | 1.75436  | 0.113083 | 53    | H      | -3.32833 | 3.236749 | 2.004088 |
| 21    | N      | 3.654    | 1.771802 | -0.00477 | 54    | C      | -2.81478 | -3.58879 | 0.059465 |
| 22    | C      | -1.63384 | 2.662422 | -0.05465 | 55    | C      | -3.58963 | -3.77367 | -1.09669 |
| 23    | C      | 3.176484 | -3.06301 | -0.10434 | 56    | C      | -4.67794 | -4.64937 | -1.09171 |
| 24    | C      | 4.289001 | -3.90169 | -0.31249 | 57    | C      | -5.01243 | -5.34841 | 0.07188  |
| 25    | C      | 5.423575 | -3.10075 | -0.31709 | 58    | C      | -4.25007 | -5.1682  | 1.228902 |
| 26    | C      | 5.030999 | -1.75495 | -0.11321 | 59    | C      | -3.15803 | -4.29595 | 1.222081 |

|    |   |          |          |          |    |   |          |          |          |
|----|---|----------|----------|----------|----|---|----------|----------|----------|
| 27 | N | 3.653781 | -1.77223 | 0.004679 | 60 | H | -3.32918 | -3.23579 | -2.00381 |
| 28 | C | 5.970164 | -0.6868  | -0.05479 | 61 | H | -5.26194 | -4.78678 | -1.99736 |
| 29 | C | 5.97025  | 0.686086 | 0.054673 | 62 | H | -5.85977 | -6.02795 | 0.076228 |
| 30 | H | 1.873659 | -5.67715 | -0.19211 | 63 | H | -4.50322 | -5.70573 | 2.138361 |
| 31 | H | -0.79983 | -5.45672 | -0.07647 | 64 | H | -2.56685 | -4.1568  | 2.122585 |
| 32 | H | -4.09116 | 1.292316 | -0.05049 | 65 | H | 3.045598 | -1.01229 | 0.270668 |
| 33 | H | -4.09132 | -1.2918  | 0.051109 |    |   |          |          |          |

**Table S12:** Coordinates of optimized geometry of **8-H**:

| Label | Symbol | X        | Y        | Z        | Label | Symbol | X        | Y        | Z        |
|-------|--------|----------|----------|----------|-------|--------|----------|----------|----------|
| 1     | C      | 2.023189 | 3.134978 | -0.24962 | 34    | H      | -4.00397 | 1.476609 | 0.829209 |
| 2     | C      | 1.582682 | 4.468373 | -0.52217 | 35    | H      | 1.744072 | -5.47854 | -0.6891  |
| 3     | C      | 0.209588 | 4.48213  | -0.4769  | 36    | H      | -0.91652 | -5.26728 | -0.70469 |
| 4     | C      | -0.24855 | 3.15724  | -0.18093 | 37    | H      | 3.952992 | -5.03932 | -0.01849 |
| 5     | N      | 0.896043 | 2.376824 | -0.07324 | 38    | H      | 6.281899 | -3.75388 | 0.353778 |
| 6     | C      | -2.10895 | -1.18485 | -0.01585 | 39    | H      | 3.258839 | -0.82244 | 0.029533 |
| 7     | C      | -3.28108 | -0.54331 | 0.445041 | 40    | H      | 4.421531 | 4.668118 | -0.35331 |
| 8     | C      | -3.2101  | 0.840881 | 0.459057 | 41    | H      | 6.61889  | 3.156888 | 0.034891 |
| 9     | C      | -1.97861 | 1.368288 | 0.008206 | 42    | H      | 7.08604  | 0.83913  | 0.424576 |
| 10    | S      | -0.94678 | 0.0421   | -0.51996 | 43    | H      | 7.020759 | -1.4025  | 0.532833 |
| 11    | C      | -1.58267 | 2.725124 | -0.03844 | 44    | C      | -3.04038 | -4.51321 | 1.006543 |
| 12    | C      | 1.708488 | -3.30629 | -0.18216 | 45    | C      | -4.131   | -5.38023 | 1.094869 |
| 13    | C      | 1.165538 | -4.59163 | -0.47816 | 46    | C      | -5.19819 | -5.26087 | 0.19942  |
| 14    | C      | -0.20706 | -4.48431 | -0.48397 | 47    | C      | -5.17287 | -4.26509 | -0.78243 |
| 15    | C      | -0.55799 | -3.13098 | -0.19426 | 48    | C      | -4.08906 | -3.39001 | -0.86601 |
| 16    | N      | 0.647202 | -2.45006 | -0.04467 | 49    | C      | -3.0061  | -3.50653 | 0.024617 |
| 17    | C      | 3.078777 | -2.99256 | -0.04111 | 50    | H      | -2.22078 | -4.60217 | 1.712837 |
| 18    | C      | 4.108671 | -3.9724  | 0.039329 | 51    | H      | -4.14802 | -6.14524 | 1.865193 |
| 19    | C      | 5.300296 | -3.31653 | 0.238539 | 52    | H      | -6.04399 | -5.93833 | 0.266649 |
| 20    | C      | 5.037019 | -1.9167  | 0.261957 | 53    | H      | -5.99493 | -4.17117 | -1.48545 |
| 21    | N      | 3.67643  | -1.7528  | 0.100298 | 54    | H      | -4.06891 | -2.62497 | -1.6362  |
| 22    | C      | -1.84827 | -2.57313 | -0.07366 | 55    | C      | -2.64349 | 3.766241 | 0.090801 |
| 23    | C      | 3.354951 | 2.678255 | -0.15169 | 56    | C      | -2.57138 | 4.743303 | 1.099814 |
| 24    | C      | 4.4775   | 3.599127 | -0.20449 | 57    | C      | -3.567   | 5.714978 | 1.218724 |
| 25    | C      | 5.585281 | 2.838627 | -0.00531 | 58    | C      | -4.64443 | 5.729705 | 0.327923 |
| 26    | C      | 5.124405 | 1.4647   | 0.138464 | 59    | C      | -4.72496 | 4.763606 | -0.68021 |
| 27    | N      | 3.761767 | 1.387803 | 0.048086 | 60    | C      | -3.73601 | 3.785435 | -0.79522 |
| 28    | C      | 6.07949  | 0.439341 | 0.330232 | 61    | H      | -1.74324 | 4.730074 | 1.801821 |
| 29    | C      | 6.045796 | -0.94364 | 0.390783 | 62    | H      | -3.50199 | 6.457068 | 2.008686 |
| 30    | H      | 2.229408 | 5.304426 | -0.74228 | 63    | H      | -5.41629 | 6.487921 | 0.418592 |
| 31    | H      | -0.43859 | 5.324743 | -0.66432 | 64    | H      | -5.55527 | 4.773069 | -1.37985 |
| 32    | H      | 0.928685 | 1.42138  | 0.252659 | 65    | H      | -3.79767 | 3.0444   | -1.58651 |
| 33    | H      | -4.13599 | -1.10148 | 0.804663 | 66    | H      | 0.720112 | -1.51096 | 0.319693 |

**Table S13:** Coordinates of optimized geometry of **8-Ha**:

| Label | Symbol | X        | Y        | Z        | Label | Symbol | X        | Y        | Z        |
|-------|--------|----------|----------|----------|-------|--------|----------|----------|----------|
| 1     | C      | -2.38636 | 3.033951 | -0.02841 | 34    | H      | 3.905346 | 1.911199 | 0.215678 |
| 2     | C      | -2.05354 | 4.408123 | -0.21189 | 35    | H      | -0.98989 | -5.82348 | 0.219221 |
| 3     | C      | -0.68486 | 4.526709 | -0.1315  | 36    | H      | 1.623902 | -5.25006 | 0.047041 |

|    |   |          |          |          |    |   |          |          |          |
|----|---|----------|----------|----------|----|---|----------|----------|----------|
| 4  | C | -0.12487 | 3.229022 | 0.092654 | 37 | H | -3.31448 | -5.48477 | 0.673394 |
| 5  | N | -1.20943 | 2.361843 | 0.171423 | 38 | H | -5.76083 | -4.37403 | 0.714559 |
| 6  | C | 2.15185  | -0.96031 | -0.03628 | 39 | H | -2.93974 | -1.43628 | -0.41248 |
| 7  | C | 3.327919 | -0.18054 | 0.045147 | 40 | H | -4.94947 | 4.145605 | -0.75183 |
| 8  | C | 3.109502 | 1.184392 | 0.121529 | 41 | H | -6.90539 | 2.30729  | -0.8056  |
| 9  | C | 1.745226 | 1.552321 | 0.070258 | 42 | H | -7.13883 | -0.08056 | -0.1962  |
| 10 | S | 0.749959 | 0.096338 | -0.06603 | 43 | H | -6.7393  | -2.22613 | 0.19305  |
| 11 | C | 1.237234 | 2.873871 | 0.100689 | 44 | C | 3.806707 | -3.77328 | -1.26773 |
| 12 | C | -1.22561 | -3.56501 | 0.045311 | 45 | C | 5.010391 | -4.48321 | -1.28829 |
| 13 | C | -0.53107 | -4.85008 | 0.114947 | 46 | C | 5.798365 | -4.56303 | -0.13651 |
| 14 | C | 0.792149 | -4.56095 | 0.022663 | 47 | C | 5.378555 | -3.92781 | 1.036345 |
| 15 | C | 0.887426 | -3.10515 | -0.08559 | 48 | C | 4.178634 | -3.21227 | 1.056972 |
| 16 | N | -0.36642 | -2.53897 | -0.08762 | 49 | C | 3.380295 | -3.13016 | -0.09503 |
| 17 | C | -2.63501 | -3.43567 | 0.148153 | 50 | H | 3.197222 | -3.712   | -2.16461 |
| 18 | C | -3.56566 | -4.45516 | 0.46621  | 51 | H | 5.329662 | -4.97304 | -2.20339 |
| 19 | C | -4.82333 | -3.8841  | 0.491204 | 52 | H | 6.732008 | -5.11726 | -0.15199 |
| 20 | C | -4.69981 | -2.50024 | 0.187719 | 53 | H | 5.982455 | -3.99024 | 1.936736 |
| 21 | N | -3.349   | -2.26137 | 0.001934 | 54 | H | 3.853932 | -2.72588 | 1.972318 |
| 22 | C | 2.084422 | -2.37579 | -0.08227 | 55 | C | 2.22078  | 4.003078 | 0.104937 |
| 23 | C | -3.66822 | 2.44744  | -0.11683 | 56 | C | 3.062247 | 4.224796 | -0.99818 |
| 24 | C | -4.8647  | 3.098825 | -0.4992  | 57 | C | 3.967742 | 5.287918 | -0.99353 |
| 25 | C | -5.87121 | 2.151553 | -0.53271 | 58 | C | 4.051731 | 6.13532  | 0.115758 |
| 26 | C | -5.31995 | 0.892926 | -0.17794 | 59 | C | 3.221594 | 5.918366 | 1.219327 |
| 27 | N | -3.97087 | 1.1027   | 0.052255 | 60 | C | 2.307356 | 4.862059 | 1.212944 |
| 28 | C | -6.07928 | -0.29883 | -0.09181 | 61 | H | 2.995724 | 3.573776 | -1.86481 |
| 29 | C | -5.82618 | -1.64395 | 0.100872 | 62 | H | 4.604944 | 5.454384 | -1.85682 |
| 30 | H | -2.76282 | 5.200456 | -0.39961 | 63 | H | 4.75895  | 6.959177 | 0.119341 |
| 31 | H | -0.10585 | 5.428657 | -0.25822 | 64 | H | 3.283842 | 6.569731 | 2.085822 |
| 32 | H | -1.13626 | 1.380004 | 0.39356  | 65 | H | 1.66628  | 4.694691 | 2.073442 |
| 33 | H | 4.311709 | -0.63054 | 0.05814  | 66 | H | -3.39527 | 0.457675 | 0.574147 |

**Table S14:** Coordinates of optimized geometry of **9**:

|       |        |          |          |          |       |        |          |          |          |
|-------|--------|----------|----------|----------|-------|--------|----------|----------|----------|
| Label | Symbol | X        | Y        | Z        | Label | Symbol | X        | Y        | Z        |
| 1     | Pd     | -2.367   | -0.00041 | 0.831746 | 35    | N      | -3.15148 | -1.5327  | -0.38442 |
| 2     | Cl     | -1.57421 | -1.6476  | 2.322792 | 36    | N      | -0.18762 | -2.40876 | -0.36861 |
| 3     | S      | 1.471644 | 0.000194 | -0.53787 | 37    | H      | -0.3326  | -1.7632  | 0.41242  |
| 4     | N      | -3.1522  | 1.531341 | -0.38457 | 38    | C      | 3.37185  | -3.6428  | -0.09563 |
| 5     | N      | -0.18871 | 2.408498 | -0.36929 | 39    | C      | -4.50997 | -1.66265 | -0.47146 |
| 6     | H      | -0.33328 | 1.762639 | 0.411567 | 40    | C      | -1.25379 | -3.11024 | -0.86376 |
| 7     | C      | 3.370237 | 3.64413  | -0.09613 | 41    | C      | 2.274587 | -2.64675 | -0.20365 |
| 8     | C      | -4.51076 | 1.660736 | -0.47139 | 42    | C      | 3.711807 | -0.69167 | 0.574361 |
| 9     | C      | -1.25523 | 3.109712 | -0.86402 | 43    | H      | 4.506712 | -1.29173 | 0.999008 |
| 10    | C      | 2.273408 | 2.647594 | -0.20431 | 44    | C      | -2.61416 | -2.72903 | -0.79722 |
| 11    | C      | 3.711506 | 0.693341 | 0.574157 | 45    | C      | -4.84648 | -2.986   | -0.93116 |
| 12    | H      | 4.506143 | 1.293892 | 0.99862  | 46    | H      | -5.85344 | -3.34625 | -1.0938  |
| 13    | C      | -2.61544 | 2.727958 | -0.79729 | 47    | C      | 0.989418 | -3.11604 | -0.55578 |
| 14    | C      | -4.84789 | 2.984001 | -0.93087 | 48    | C      | 5.623295 | -4.38855 | -0.64463 |
| 15    | H      | -5.85502 | 3.343849 | -1.09332 | 49    | H      | 6.565486 | -4.22013 | -1.15828 |



|    |   |          |          |          |    |    |          |          |          |
|----|---|----------|----------|----------|----|----|----------|----------|----------|
| 16 | C | 0.988031 | 3.116312 | -0.5564  | 50 | C  | 4.209061 | -5.76998 | 0.742356 |
| 17 | C | 5.62156  | 4.39079  | -0.64435 | 51 | H  | 4.052705 | -6.67083 | 1.328607 |
| 18 | H | 6.563922 | 4.222905 | -1.15777 | 52 | C  | 4.606473 | -3.44047 | -0.74033 |
| 19 | C | 4.206507 | 5.77132  | 0.742692 | 53 | H  | 4.754377 | -2.54546 | -1.33641 |
| 20 | H | 4.049799 | 6.671694 | 1.329418 | 54 | C  | -3.67113 | -3.63399 | -1.16999 |
| 21 | C | 4.605073 | 3.442384 | -0.74061 | 55 | H  | -3.53452 | -4.63836 | -1.54413 |
| 22 | H | 4.753398 | 2.547712 | -1.33701 | 56 | C  | -5.51546 | -0.69173 | -0.25921 |
| 23 | C | -3.67284 | 3.632523 | -1.16978 | 57 | H  | -6.50812 | -1.13388 | -0.21028 |
| 24 | H | -3.53671 | 4.637001 | -1.54382 | 58 | C  | -0.72751 | -4.30462 | -1.44713 |
| 25 | C | -5.51579 | 0.689348 | -0.25915 | 59 | H  | -1.30448 | -5.04111 | -1.98657 |
| 26 | H | -6.50866 | 1.131001 | -0.21013 | 60 | C  | 0.634455 | -4.31564 | -1.24525 |
| 27 | C | -0.72952 | 4.304452 | -1.44714 | 61 | H  | 1.341158 | -5.05185 | -1.59869 |
| 28 | H | -1.30688 | 5.040897 | -1.9862  | 62 | C  | 2.557262 | -1.2739  | 0.000455 |
| 29 | C | 0.632477 | 4.315943 | -1.2455  | 63 | C  | 5.42889  | -5.55604 | 0.09742  |
| 30 | H | 1.338818 | 5.052568 | -1.59878 | 64 | C  | 3.189092 | -4.82449 | 0.646641 |
| 31 | C | 2.556716 | 1.274903 | 0.000052 | 65 | H  | 2.249176 | -4.98428 | 1.165338 |
| 32 | C | 5.426588 | 5.557942 | 0.098059 | 66 | Cl | -1.57506 | 1.647428 | 2.322519 |
| 33 | C | 3.186881 | 4.82552  | 0.646434 | 67 | H  | 6.220293 | 6.295401 | 0.173447 |
| 34 | H | 2.246823 | 4.984751 | 1.164966 | 68 | H  | 6.222825 | -6.2933  | 0.172342 |

**Table S15:** Coordinates of optimized geometry of 9':

| Label | Symbol | X        | Y        | Z        | Label | Symbol | X        | Y        | Z        |
|-------|--------|----------|----------|----------|-------|--------|----------|----------|----------|
| 1     | Pd     | -1.77204 | 0.533115 | 0.855049 | 35    | N      | 0.454775 | -2.67124 | -0.351   |
| 2     | Cl     | 0.034982 | 0.769378 | 2.324775 | 36    | H      | 0.118788 | -1.81701 | 0.082928 |
| 3     | S      | 1.332443 | 0.184743 | -0.85831 | 37    | C      | 4.242678 | -2.67057 | -0.16246 |
| 4     | N      | -3.46846 | 0.555515 | -0.44723 | 38    | C      | -3.87629 | -3.19614 | -0.2655  |
| 5     | N      | -1.13172 | 2.039114 | -0.54258 | 39    | C      | -0.32207 | -3.77401 | -0.59849 |
| 6     | C      | 1.952547 | 4.200092 | -0.1622  | 40    | C      | 2.881288 | -2.09021 | -0.31727 |
| 7     | C      | -4.76925 | 0.128438 | -0.45731 | 41    | C      | 3.653341 | 0.232034 | 0.311011 |
| 8     | C      | -2.27244 | 2.542409 | -1.09536 | 42    | H      | 4.582088 | -0.09119 | 0.76335  |
| 9     | C      | 1.204905 | 2.927131 | -0.357   | 43    | C      | -1.73167 | -3.82543 | -0.54553 |
| 10    | C      | 3.206707 | 1.53921  | 0.317168 | 44    | C      | -3.85276 | -4.59975 | -0.49812 |
| 11    | H      | 3.746008 | 2.359361 | 0.772239 | 45    | H      | -4.73236 | -5.22686 | -0.53914 |
| 12    | C      | -3.46375 | 1.798114 | -1.04307 | 46    | C      | 1.803441 | -2.9841  | -0.48776 |
| 13    | C      | -5.59555 | 1.153503 | -1.05672 | 47    | C      | 6.589287 | -2.74631 | -0.80432 |
| 14    | H      | -6.66343 | 1.064008 | -1.20827 | 48    | H      | 7.402301 | -2.37883 | -1.42372 |
| 15    | C      | -0.17056 | 3.020121 | -0.65836 | 49    | C      | 5.766241 | -4.23822 | 0.907706 |
| 16    | C      | 3.815984 | 5.674153 | -0.68681 | 50    | H      | 5.940208 | -5.02215 | 1.63897  |
| 17    | H      | 4.719723 | 5.874983 | -1.25507 | 51    | C      | 5.314547 | -2.20043 | -0.94335 |
| 18    | C      | 2.166747 | 6.358068 | 0.940898 | 52    | H      | 5.135256 | -1.41646 | -1.67242 |
| 19    | H      | 1.793064 | 7.083737 | 1.657377 | 53    | C      | -2.54096 | -4.98329 | -0.68568 |
| 20    | C      | 3.133572 | 4.473539 | -0.87561 | 54    | H      | -2.17281 | -5.97777 | -0.89184 |
| 21    | H      | 3.501767 | 3.746435 | -1.59301 | 55    | C      | -5.05419 | -2.44268 | -0.05744 |
| 22    | C      | -4.77712 | 2.176115 | -1.45316 | 56    | H      | -5.91016 | -3.09645 | 0.093738 |
| 23    | H      | -5.04819 | 3.092487 | -1.95872 | 57    | C      | 0.561004 | -4.83819 | -0.93216 |
| 24    | C      | -5.39389 | -1.10707 | -0.12271 | 58    | H      | 0.25119  | -5.83234 | -1.2191  |
| 25    | H      | -6.46878 | -0.96273 | -0.03059 | 59    | C      | 1.850751 | -4.36032 | -0.85948 |
| 26    | C      | -2.05624 | 3.870024 | -1.60196 | 60    | H      | 2.758092 | -4.89886 | -1.08724 |

|    |   |          |          |          |    |    |          |          |          |
|----|---|----------|----------|----------|----|----|----------|----------|----------|
| 27 | H | -2.78542 | 4.48083  | -2.11591 | 61 | C  | 2.740838 | -0.68281 | -0.26344 |
| 28 | C | -0.76257 | 4.18109  | -1.30191 | 62 | C  | 6.819535 | -3.76668 | 0.121434 |
| 29 | H | -0.22368 | 5.081237 | -1.55937 | 63 | C  | 4.488999 | -3.69721 | 0.767467 |
| 30 | C | 1.923997 | 1.71515  | -0.24998 | 64 | H  | 3.677232 | -4.05077 | 1.395074 |
| 31 | C | 3.335487 | 6.619396 | 0.222922 | 65 | Cl | -2.74493 | -0.97455 | 2.351427 |
| 32 | C | 1.478297 | 5.160691 | 0.749268 | 66 | H  | 3.870089 | 7.553096 | 0.371795 |
| 33 | H | 0.58123  | 4.947054 | 1.321636 | 67 | H  | 7.81392  | -4.18937 | 0.231232 |
| 34 | N | -2.57758 | -2.76123 | -0.32492 | 68 | H  | -2.30683 | -1.84401 | 0.023095 |

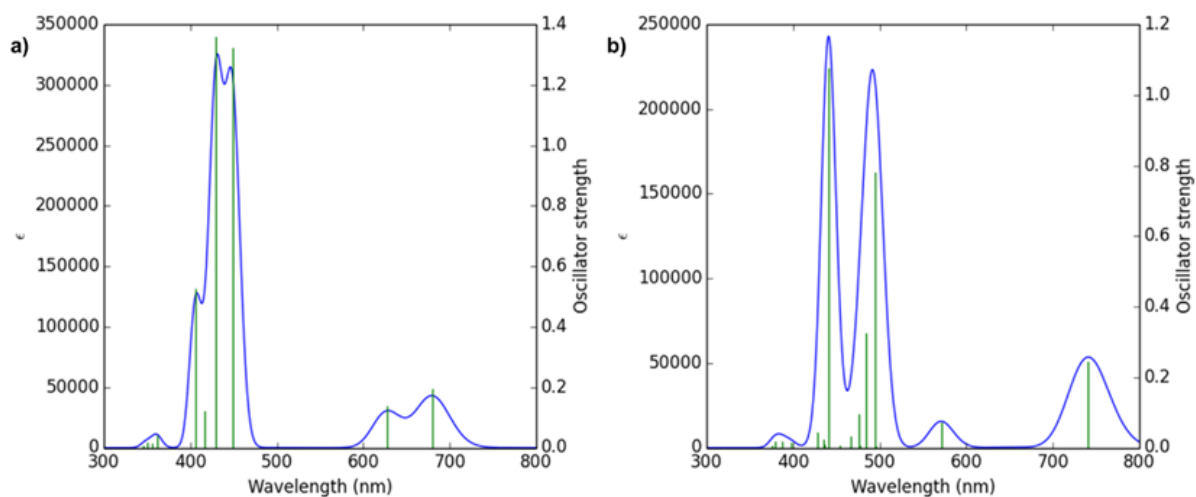

**Figure S21:** Calculated absorption spectra of a) sapphycene **8** and b) its Pd(II)-complex **9** in chloroform.

**Table S16:** Calculated electronic transition of **8** in chloroform.

| Sl. No | Wavelength(nm) | Oscillator strength | Electronic transition                                |
|--------|----------------|---------------------|------------------------------------------------------|
| 1      | 406            | 0.528               | H-3 → LUMO (81%), H-1 → L+1 (11%)                    |
| 2      | 429            | 1.360               | H-1 → L+1 (68%), HOMO → LUMO (15%)                   |
| 3      | 448            | 1.324               | HOMO → L+1 (67%), H-1 → LUMO (26%)                   |
| 4      | 627            | 0.1379              | H-1 → LUMO (57%), HOMO → L+1 (21%)                   |
| 5      | 679            | 0.196               | HOMO → LUMO (63%), H-1 → LUMO (15%), H-1 → L+1 (15%) |

**Table S17:** Calculated electronic transition of **9** in chloroform.

| Sl. No | Wavelength(nm) | Oscillator strength | Electronic transition                                |
|--------|----------------|---------------------|------------------------------------------------------|
| 1      | 441            | 1.078               | H-1 → L+1 (44%), H-1 → L+2 (37%)                     |
| 2      | 484            | 0.326               | H-1 → L+1 (32%), H-1 → L+2 (57%)                     |
| 3      | 494            | 0.782               | H-1 → LUMO (26%), HOMO → L+1 (40%), HOMO → L+2 (20%) |
| 4      | 740            | 0.246               | HOMO → LUMO (82%)                                    |

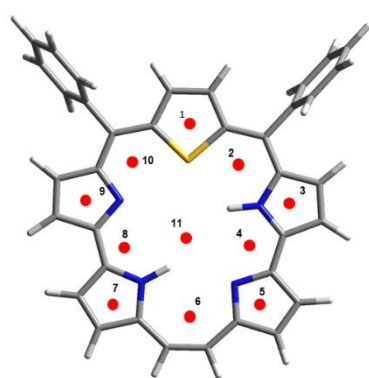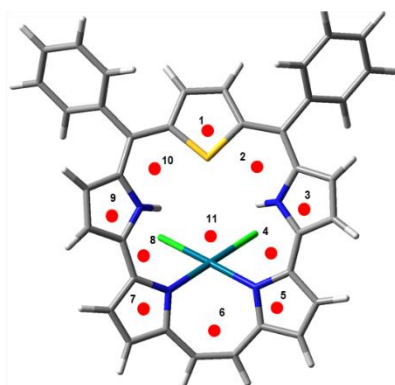

| Positions | NICS(0) for <b>8</b> | NICS(0) for <b>9</b> |
|-----------|----------------------|----------------------|
| 1         | -20.4                | -19.2                |
| 2         | -22.7                | -22.2                |
| 3         | -13.5                | -13.9                |
| 4         | -29.6                | -29.1                |
| 5         | -2.9                 | -7.2                 |
| 6         | -21.5                | -20.5                |
| 7         | -14.7                | -7.2                 |
| 8         | -29.7                | -29.1                |
| 9         | -0.8                 | -13.9                |
| 10        | -21.9                | -22.2                |
| 11        | -13.6                | -10.1                |
|           |                      |                      |

| Compounds | NICS(0) | NICS <sub>zz</sub> (1) | HOMA  |
|-----------|---------|------------------------|-------|
| <b>8</b>  | -13.6   | -12.7                  | 0.738 |
| <b>9</b>  | -10.1   | -11.9                  | 0.669 |

**Figure S22.** NICS(0), NICS<sub>zz</sub>(1) and HOMA indices of **8** and **9** calculated from optimized geometries.

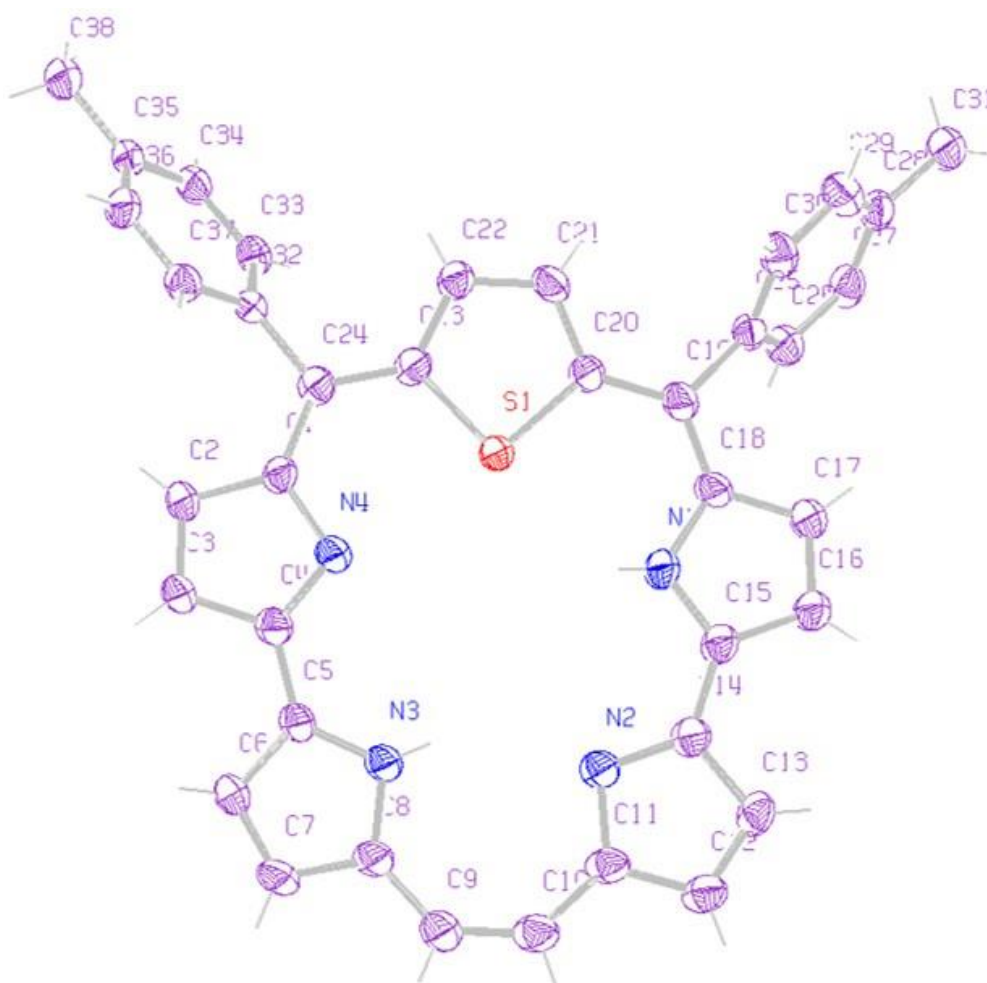

**Figure S23:** ORTEP diagram (with 40% thermal ellipsoid) of **8**.

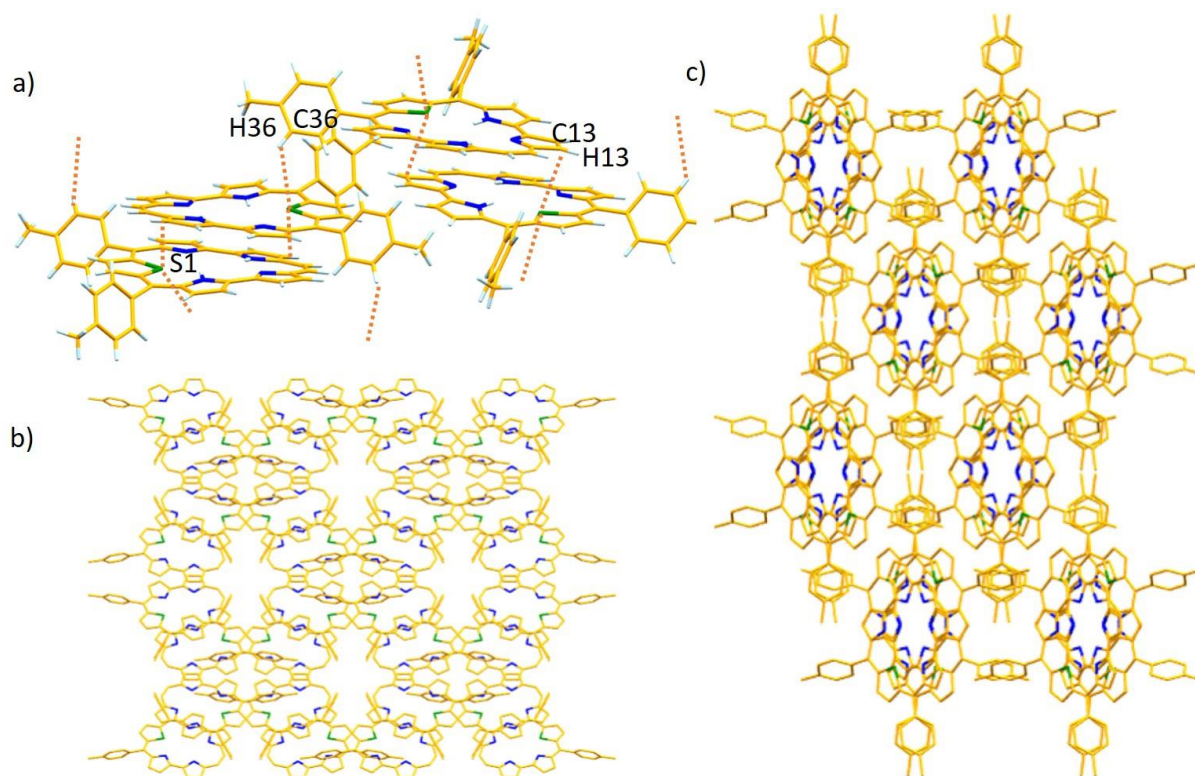

**Figure S24:** packing diagram of **8**: a) showing alignment of  $\pi$ -stacked planes, b) along  $a$ -axis, c) along  $c$ -axis (hydrogens are removed for clarity).

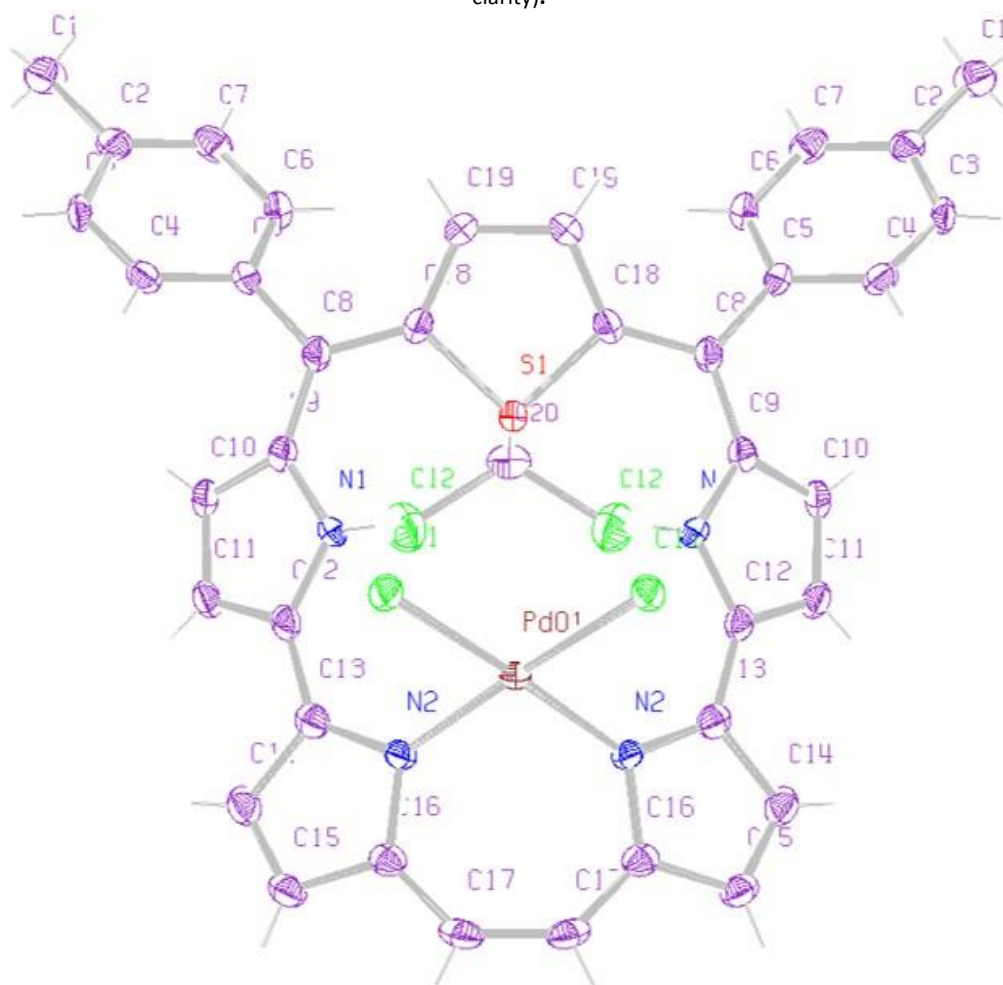

**Figure S25:** ORTEP diagram (with 40% thermal ellipsoid) of **9**.

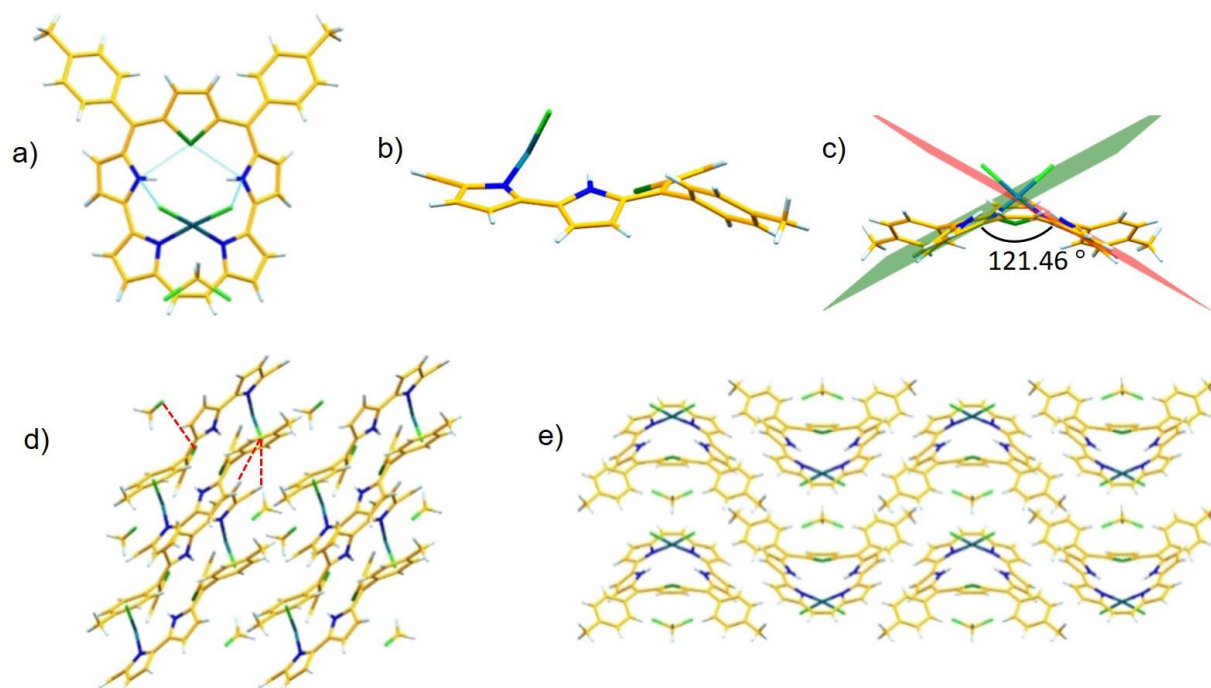

Figure S26: crystal structure of 9: a) front view b) side view c) side view showing dihedral planes of bipyrrroles and d) packing diagram along *b*-axis e) packing diagram along *a*-axis.

**Table S18:** Crystal data and structure refinement parameters for sapphyrene **8**:

|                                   |                                                                                                                |
|-----------------------------------|----------------------------------------------------------------------------------------------------------------|
| Empirical formula                 | C <sub>38</sub> H <sub>28</sub> N <sub>4</sub> S                                                               |
| Formula weight                    | 572.2                                                                                                          |
| Temperature                       | 109(2) K                                                                                                       |
| Wavelength                        | 0.71073 Å                                                                                                      |
| Crystal system, space group       | Monoclinic, I 2/a                                                                                              |
| Unit cell dimensions              | alpha = 90 deg. a = 12.4940(3) Å<br>beta = 91.562(2) deg. b = 22.0708(8) Å<br>gamma = 90 deg. c = 20.4806(8) Å |
| Volume                            | 5645.5(3) Å <sup>3</sup>                                                                                       |
| Z, Calculated density             | 8, 1.348 Mg/m <sup>3</sup>                                                                                     |
| Absorption coefficient            | 0.151 mm <sup>-1</sup>                                                                                         |
| F(000)                            | 3150                                                                                                           |
| Crystal size                      | 0.14 x 0.12 x 0.08 mm                                                                                          |
| Theta range for data collection   | 1.874 to 25.999 deg.                                                                                           |
| Limiting indices                  | -15 ≤ h ≤ 15, -27 ≤ k ≤ 27, -24 ≤ l ≤ 25                                                                       |
| Reflections collected / unique    | 24633 / 5472 [R(int) = 0.1331]                                                                                 |
| Completeness to theta = 25.242    | 98.6 %                                                                                                         |
| Refinement method                 | Full-matrix least-squares on F <sup>2</sup>                                                                    |
| Data / restraints / parameters    | 5472 / 12 / 398                                                                                                |
| Goodness-of-fit on F <sup>2</sup> | 1.017                                                                                                          |
| Final R indices [I > 2σ(I)]       | R1 = 0.0723, wR2 = 0.1720                                                                                      |
| R indices (all data)              | R1 = 0.1337, wR2 = 0.2162                                                                                      |
| Extinction coefficient            | n/a                                                                                                            |
| Largest diff. peak and hole       | 0.663 and -0.802 e.Å <sup>-3</sup>                                                                             |

**Table S19:** Crystal data and structure refinement data for Pd(II)sapphyrene **9**:

|                             |                                                                    |
|-----------------------------|--------------------------------------------------------------------|
| Empirical formula           | C <sub>39</sub> H <sub>30</sub> Cl <sub>4</sub> N <sub>4</sub> PdS |
| Formula weight              | 834.93                                                             |
| Temperature                 | 293(2) K                                                           |
| Wavelength                  | 0.71073 Å                                                          |
| Crystal system, space group | Monoclinic, P 21/m                                                 |
| Unit cell dimensions        | alpha = 90 deg. a = 7.9019(2) Å                                    |

|                                   |                                                                            |
|-----------------------------------|----------------------------------------------------------------------------|
|                                   | beta = 102.071(3) deg. b = 22.3765(6) Å<br>gamma = 90 deg. c = 9.7921(4) Å |
| Volume                            | 1693.13(9) Å <sup>3</sup>                                                  |
| Z, Calculated density             | 2, 1.638 mg/m <sup>3</sup>                                                 |
| Absorption coefficient            | 0.963 mm <sup>-1</sup>                                                     |
| F(000)                            | 844                                                                        |
| Crystal size                      | 0.200 x 0.150 x 0.100 mm                                                   |
| Theta range for data collection   | 2.313 to 25.026 deg.                                                       |
| Limiting indices                  | -9 ≤ h ≤ 9, -26 ≤ k ≤ 26, -11 ≤ l ≤ 11                                     |
| Reflections collected / unique    | 10880 / 3009 [R(int) = 0.0686]                                             |
| Completeness to theta = 25.026    | 97.6 %                                                                     |
| Refinement method                 | Full-matrix least-squares on F <sup>2</sup>                                |
| Data / restraints / parameters    | 3009 / 0 / 227                                                             |
| Goodness-of-fit on F <sup>2</sup> | 1.081                                                                      |
| Final R indices [I > 2σ(I)]       | R1 = 0.0432, wR2 = 0.1044                                                  |
| R indices (all data)              | R1 = 0.0548, wR2 = 0.1124                                                  |
| Extinction coefficient            | n/a                                                                        |
| Largest diff. peak and hole       | 1.0158 and -1.000 e. Å <sup>-3</sup>                                       |

## References:

- [1] CrysAlisPRO, Oxford Diffraction /Agilent Technologies UK Ltd, Yarnton, England.
- [2] a) SHELXL -Version 2014/7; Program for the Solution and Refine-ment of Crystal Structures, University of Göttingen, Germany, 1993-2014; b) Sheldrick, G. M. A short history of SHELX. *Acta Cryst.* 2008, A64, 112.
- [3] a) J. Ostapko, K. Nawara, M. Kijak, J. Buczyńska, B. Leśniewska, M. Pietrzak, G. Orzanowska, J. Waluk, *Chem. Eur. J.* **2016**, 22, 17311; b) Eun-K. Sim, S.-D. Jeong, D.-W. Yoon, S.-J. Hong, Y. Kang, C.-H. Lee, *Org. Lett.*, 2006, **8**, 3355.
- [4] Gaussian 09, (Revision C.01), M. J. Frisch et al. Gaussian, Inc., Wallingford CT, 2010.
- [5] P. von R. Schleyer, C. Maerker, A. Dransfeld, H. Jiao, N. J. R. van Eikema Hommes, *J. Am. Chem. Soc.*, 1996,**118**, 6317.
- [6] T. M. Krygowski, M. Cryański, *Tetrahedron*, 1996, **52**, 1713.
- [7] T. M. Krygowski, M. Cryański, *Tetrahedron*, 1996, **52**, 10255.
- [8] T. M. Krygowski, M. Cryański, *Chem. Rev.*, 2001, **101**, 1385.
